# Supplementary material
Source: publisher figshare collection journal article supplement (https://gsajournals.figshare.com/ndownloader/files/22717442)
Supplement: Supplementary file 1 [file 22717442]

## Sheet: Table_S1
Supplemental Table S1. Known causal genes and their orthologs in major model plants and crop species. Empty cells indicate no ortholog in given species
Index	causal_gene_name	Trait	Trait_Category	Organism	Lineage	ortholog group	Fine ortholog	Arabidopsis_thaliana	Glycine_max	Brassica_rapa	Solanum_lycopersicum	Oryza_sativa_Japonica	Oryza_sativa_Indica	Setaria_italica	Zea_mays	Sorghum_bicolor	Brachypodium_distachyon	Hordeum_vulgare	Setaria_viridis
1	heavy metal atpase3 (HMA3)	Metal_tolerance	abiotic_stress_response	Thlaspi_caerulescens_	dicot	KOG0207	N	AT4G30110.1,AT4G37270.1,AT2G19110.1,AT4G33520.2,AT5G21930.1,AT5G44790.1,AT1G63440.1,AT4G30120.1	GLYMA01G42800.1,GLYMA19G32190.1,GLYMA17G06800.1,GLYMA08G07710.1,GLYMA04G05897.1,GLYMA17G18250.2,GLYMA05G21280.1,GLYMA04G05904.1,GLYMA06G05890.1,GLYMA08G19110.1,GLYMA15G17000.1,GLYMA08G09240.1,GLYMA01G42790.2,GLYMA05G24470.1,GLYMA13G00630.2GLYMA03G21650.1,GLYMA09G05710.1,GLYMA11G02661.1,GLYMA05G24520.2,GLYMA16G10760.1,GLYMA09G06166.1,GLYMA15G05891.1,GLYMA05G26330.1,GLYMA08G01680.2	Bra027573.1-P,Bra011750.1-P,Bra034566.1-P,Bra024449.1-P,Bra003110.1-P,Bra027641.1-P,Bra025102.1-P,Bra011164.1-P,Bra039194.1-P,Bra024103.1-P,Bra038842.1-P,Bra024107.1-P,Bra011165.1-P,Bra011450.1-P,Bra002374.1-P	Solyc01g105160.2.1,Solyc00g031730.1.1,Solyc08g080890.2.1,Solyc11g062120.1.1,Solyc01g105170.2.1,Solyc11g062100.1.1,Solyc02g068490.2.1,Solyc08g061610.2.1,Solyc02g092920.2.1,Solyc08g080870.2.1,Solyc07g009130.2.1	LOC_Os08g37950.1,LOC_Os06g48720.1,LOC_Os07g43040.1,LOC_Os06g47550.1,LOC_Os03g08070.1,LOC_Os07g12900.1,LOC_Os04g46940.1,LOC_Os03g27040.1,LOC_Os06g45500.1,LOC_Os02g07630.1,LOC_Os02g10290.1,	BGIOSGA016903-PA,BGIOSGA010613-PA,BGIOSGA038678-PA,BGIOSGA011343-PA,BGIOSGA007052-PA,BGIOSGA020639-PA,BGIOSGA024568-PA,BGIOSGA038704-PA,BGIOSGA020589-PA,BGIOSGA007732-PA,BGIOSGA020984-PA,BGIOSGA026167-PA,BGIOSGA028879-PA,BGIOSGA020720-PA	Si034145m,Si016209m,Si005768m,Si009257m,Si009256m,Si033111m,Si039969m,Si005860m,Si013198m,Si031369m,Si034408m,Si005738m,Si028881m,Si016225m	AC211212.4_FGP002,AC205008.4_FGP002,GRMZM2G099191,GRMZM2G175576,GRMZM2G061946,GRMZM2G029951,GRMZM2G034195,AC211645.4_FGP002,GRMZM2G010152,GRMZM2G134721,GRMZM2G102786,GRMZM2G497552,GRMZM2G493058,GRMZM2G315931,GRMZM2G383274,GRMZM5G830483,GRMZM2G000219,GRMZM2G384417,GRMZM5G855347,GRMZM2G404702,GRMZM2G143512,GRMZM2G360419,GRMZM2G030358,GRMZM2G144083,GRMZM5G874802,GRMZM5G814983,GRMZM2G455491,GRMZM2G44…	Sb04g004820.1,Sb06g024900.1,Sb02g006940.1,Sb10g028080.1,Sb06g024910.1,Sb07g029010.1,Sb10g028920.1,Sb01g045340.1,Sb10g029770.1,Sb02g039730.1,Sb02g006950.1,Sb01g033700.1,Sb10g026600.1,Sb04g006600.1	BRADI3G38790.1,BRADI1G72790.1,BRADI1G31987.1,BRADI1G33347.1,BRADI5G17990.1,BRADI1G34140.1,BRADI3G05340.1,BRADI1G53670.1,BRADI1G60840.1,BRADI3G07110.1,BRADI1G21380.1	MLOC_39833.1,MLOC_52795.2,MLOC_5890.1,MLOC_80218.3,MLOC_18862.4,MLOC_30801.1,MLOC_4755.1,MLOC_78645.1,MLOC_57716.1,MLOC_15393.4,MLOC_10131.1,MLOC_58244.3	Sevir.9G524700, Sevir.4G153600, Sevir.4G153600, Sevir.7G205900, Sevir.2G092800, Sevir.9G385500, Sevir.9G038966, Sevir.6G196800, Sevir.9G385500, Sevir.9G038966, Sevir.4G255000, Sevir.1G048900
2	flavonoid 3',5'-hydroxylase (F3'5'H)	Plant_coloration_(flowers)	color_texture_flavor_and_fragrance	Annual_phlox	dicot	ENOG411BNKG	N		GLYMA20G08160.1,GLYMA13G04210.1		Solyc11G066580.1.1	LOC_Os03g25150		Si035183m	GRMZM2G119067	Sb01g034470.1,Sb01g034460.1	BRADI2G11620.1,BRADI1G61577.1		Sevir.9G395800
3	R2R3-Myb	Plant_coloration_(flowers)	color_texture_flavor_and_fragrance	Annual_phlox	dicot	ENOG411BRS3	N	AT1G66370	GLYMA09G36983.1,GLYMA19G02980.2,GLYMA09G36966.1,GLYMA18G49690.1,GLYMA09G37010.2,GLYMA18G49670.2	Bra004162,Bra039763	Solyc10g086250.1.1,Solyc10g086260.1.1,Solyc10g086270.1.1,Solyc10g086290.1.1
4	Waxy /GBSS	Amylose_content	color_texture_flavor_and_fragrance	Hordeum_vulgare	monocot	COG0297	Y	AT1G32900.1	GLYMA07G05580.3,GLYMA10G31540.3,GLYMA16G02110.3,GLYMA20G36040.1	Bra010189.1-P	Solyc08g083320.2.1	LOC_Os06g04200.1	BGIOSGA022241-PA	Si006103m	GRMZM2G024993	Sb10g002140.1	BRADI1G50090.1	MLOC_64657.2	Sevir.4G021900
5	CBF2-CBF4, CBF13	Cold_resistance	abiotic_stress_response	Hordeum_vulgare	monocot	ENOG410YK37	Y				Solyc03g026270.1.1,Solyc03g026280.2.1,Solyc03g124110.1.1	LOC_Os09g35020.1	BGIOSGA029416-PA	Si030869m	GRMZM2G069082,GRMZM2G124037	Sb02g030310.1	BRADI4G35630.1	MLOC_4956.1,MLOC_74460.1	Sevir.7G217200
6	EARLY FLOWERING 3/ EARLYMATURITY8	Flowering_time	development	Hordeum_vulgare	monocot	ENOG4111XSP	Y	AT3G21320.1	GLYMA07G01601.1,GLYMA08G21115.1	Bra001825.1-P,Bra023887.1-P,Bra031274.1-P	Solyc06g062480.2.1			Si021308m	AC233870.1_FGP003	Sb09g030700.1	BRADI2G14290.1	MLOC_75281.1	Sevir.3G123200
7	Flowering locus T (=HvFT=VRN3)	Flowering_time	development	Hordeum_vulgare	monocot	COG1881	Y	AT1G65480.1,AT4G20370.1	GLYMA02G07650.1,GLYMA08G47810.1,GLYMA08G47816.1,GLYMA08G47823.1,GLYMA16G04840.1,GLYMA16G26660.1,GLYMA16G26690.1,GLYMA18G53680.1,GLYMA18G53690.1,GLYMA19G28390.1		Solyc03g063100.1.1	LOC_Os01g11940.1_,LOC_Os06g06300.1_,LOC_Os06g06320.1	BGIOSGA022349-PA,BGIOSGA022351-PA	Si007366m,Si008120m,Si008517m	GRMZM2G051338,GRMZM2G373928	Sb03g001700.1,Sb10g003940.1		MLOC_68576.1	Sevir.4G195400, Sevir.4G102300, Sevir.4G065600
8	PRR37-like Photoperiod-H1 (Ppd-H1)	Flowering_time	development	Hordeum_vulgare	monocot	COG5641	Y	AT5G02810.1	GLYMA10G05520.2,GLYMA11G15580.2,GLYMA12G07861.1,GLYMA13G19871.1	Bra009565.1-P,Bra028861.1-P	Solyc04g049670.2.1,Solyc04g049680.2.1	LOC_Os07g49460.1		Si033274m	GRMZM2G033962			MLOC_81154.10	Sevir.9G449300
9	VRN2	Flowering_time	development	Hordeum_vulgare	monocot	ENOG410YJ29	Y	AT2G35670.1,AT4G16810.1,AT4G16845.1,AT5G51230.1	GLYMA01G41460.1,GLYMA11G03955.1	Bra021078.1-P	Solyc03g093640.2.1	LOC_Os04g08034.1,LOC_Os09g13630.1	BGIOSGA030026-PA	Si029239m,Si034803m	GRMZM2G058158,GRMZM2G157422	Sb02g020800.1	BRADI3G03106.2	MLOC_64195.14,MLOC_64864.1,MLOC_71026.4	Sevir.2G175200, Sevir.9G088400
10	TFL1 / HvCEN	Growth_determination_habit	development	Hordeum_vulgare	monocot	KOG3346	Y	AT2G27550.1,AT5G03840.1	GLYMA03G35250.1,GLYMA10G08340.1,GLYMA12G30940.2,GLYMA13G22030.1,GLYMA13G39360.2,GLYMA19G37890.1,GLYMA20G02845.1	Bra000506.1-P,Bra005783.1-P,Bra009508.1-P,Bra012010.1-P,Bra028815.1-P,Bra034357.1-P	Solyc09g009560.1.1	LOC_Os11g05470.1	BGIOSGA034481-PA	Si028168m	GRMZM2G092008,GRMZM2G338454	Sb08g003210.1	BRADI4G42400.1	MLOC_35818.3,MLOC_44160.1	Sevir.8G033800
11	MLO	Pathogen_resistance	biotic_stress_response	Hordeum_vulgare	monocot	ENOG410ZUVB	Y		GLYMA04G01730.1,GLYMA06G01820.1			LOC_Os03g03700.1_,LOC_Os06g29110.1	BGIOSGA011531-PA,BGIOSGA022929-PA	Si034998m	GRMZM2G032219	Sb01g048500.1	BRADI1G76500.1	MLOC_70290.3	Sevir.9G559300
12	Mla1	Pathogen_resistance	biotic_stress_response	Hordeum_vulgare	monocot	ENOG411BZQ2	N										BRADI2G39247.1	MLOC_64444.1,MLOC_21734.1
13	Mla13	Pathogen_resistance	biotic_stress_response	Hordeum_vulgare	monocot	ENOG411BZQ2	N										BRADI2G39247.1	MLOC_64444.1,MLOC_21734.1
14	Mla6	Pathogen_resistance	biotic_stress_response	Hordeum_vulgare	monocot	ENOG411BZQ2	N										BRADI2G39247.1	MLOC_64444.1,MLOC_21734.1
15	teosinte branched 1 (tb1) = IntC	Plant_and_inflorescence_architecture	development	Hordeum_vulgare	monocot	ENOG410Z0VC	Y					LOC_Os03g49880.1	BGIOSGA013417-PA	Si038692m	AC190734.2_FGP003,AC233950.1_FGP002	Sb01g010690.1	BRADI1G11060.1	MLOC_70116.1	Sevir.9G122200
16	VRS1 = SIX-ROWED SPIKE 1	Plant_and_inflorescence_architecture	development	Hordeum_vulgare	monocot	ENOG410Z2UE	Y	AT2G18550.1,AT4G36740.1,AT5G66700.1	GLYMA01G38390.1,GLYMA02G06560.2,GLYMA11G06940.1	Bra010573.1-P,Bra012093.1-P,Bra017780.1-P,Bra028099.1-P,Bra031819.1-P,Bra037154.1-P,Bra040941.1-P	Solyc02g062960.2.1,Solyc02g085630.2.1,Solyc03g034110.2.1,Solyc03g034120.2.1,Solyc03g034130.2.1,Solyc03g034150.1.1	LOC_Os07g39320.1	BGIOSGA026014-PA	Si031009m	GRMZM2G062244,GRMZM2G104204	Sb02g037560.1	BRADI1G23460.1	MLOC_77488.1	Sevir.2G379700
17	HvbHLH1	Plant_color	color_texture_flavor_and_fragrance	Hordeum_vulgare	monocot	ENOG410Z2WK	Y	AT1G63650.1,AT4G00480.2,AT5G41315.1	GLYMA03G01180.1,GLYMA05G37770.1,GLYMA07G07740.1,GLYMA08G01810.1	Bra000970.1-P,Bra025508.1-P,Bra027653.1-P,Bra027796.1-P,Bra037343.1-P	Solyc08g081140.2.1	LOC_Os04g47040.1,LOC_Os04g47059.1,LOC_Os04g47080.1	BGIOSGA014565-PA,BGIOSGA014566-PA,BGIOSGA014567-PA,BGIOSGA015472-PA	Si000845m,Si012401m	GRMZM2G172795,GRMZM5G822829	Sb06g016380.1,Sb06g025020.1,Sb06g025040.1,Sb06g025060.1		MLOC_38470.1	Sevir.5G416700, Sevir.7G207500
18	Hooded/Knox3	Plant_morphology_(flowers)	development	Hordeum_vulgare	monocot	ENOG410XPMQ	Y					LOC_Os07g03770.1	BGIOSGA025091-PA	Si031454m	GRMZM2G028041,GRMZM2G452178	Sb02g002200.1	BRADI1G57607.1	MLOC_11678.1	Sevir.9G073300
19	I cluster	Pathogen_resistance	biotic_stress_response	bean	dicot	ENOG411DSDC	Y	AT1G69550,AT3G25510	GLYMA12G15850.2,GLYMA06G41430.1,GLYMA12G16450.1,GLYMA06G40710.1,GLYMA06G40950.1,GLYMA06G40980.1,GLYMA06G41241.1,GLYMA06G43850.1,GLYMA06G41290.2,GLYMA06G40690.1,GLYMA06G41380.2,GLYMA06G40780.1	Bra019409,Bra020861	Solyc05G006630.2.1,Solyc11G011090.1.1			Si025838m,Si026026m		Sb05g025450.1,Sb05g025470.1	BRADI2G41920.1	MLOC_7267.3,MLOC_77255.1
20	BOLTING TIME CONTROL 1 (BvBTC1)	Flowering_time	development	beet	dicot	ENOG411BEWH	N	AT5G02810	GLYMA10G05520.2,GLYMA13G19871.1	Bra009565	Solyc04g049670.2.1	LOC_Os07g49460	BGIOSGA010964-PA	Si033274m,Si034368m	GRMZM2G005732,GRMZM2G095727,GRMZM2G033962	Sb06g014570		MLOC_81154.10	Sevir.9G449300, Sevir.9G449300
21	CYP76AD1	Plant_coloration	color_texture_flavor_and_fragrance	beet	dicot	ENOG4115PYS	N					LOC_Os10g08540.1,LOC_Os10g08319.1,LOC_Os10g08474	BGIOSGA032583-PA,BGIOSGA032580-PA,BGIOSGA032584-PA	Si035322m,Si040027m	GRMZM5G851862	Sb01g016910.1,Sb01g016900.1	BRADI3G22560.1	MLOC_53378.1	Sevir.9G188800
22	FLC-2	Flowering_time	development	Brassica_rapa	dicot	ENOG411BUQE	N	At5G10140	GLYMA05G28130.1,GLYMA08G11110.1	Bra028599,Bra006051
23	qSH1	Seed_shattering	development	Brassica_rapa	dicot	ENOG410XPMQ	Y	AT5G02030.1	GLYMA01G25710.2,GLYMA03G17397.1,GLYMA18G41280.1	Bra005703.1-P,Bra009618.1-P,Bra028883.1-P	Solyc09g011380.2.1,Solyc10g086640.1.1	LOC_Os01g62920.1,LOC_Os05g38120.1	BGIOSGA000492-PA,BGIOSGA019968-PA	Si000753m,Si021626m	GRMZM2G074645,GRMZM2G125976,GRMZM2G154641	Sb03g039840.1,Sb09g022270.1	BRADI2G23530.1,BRADI2G54940.1	MLOC_3638.2,MLOC_66099.1	Sevir.5G386500, Sevir.5G386500
24	retr02/eIF(iso)4E	Pathogen_resistance	biotic_stress_response	Brassica_rapa	dicot	COG5053	Y	AT5G35620.1	GLYMA10G27570.1,GLYMA20G21493.1	Bra035393.1-P,Bra035531.1-P,Bra039484.1-P	Solyc09g090580.2.1	LOC_Os10g32970.1	BGIOSGA033102-PA	Si037504m	GRMZM2G022019,GRMZM2G445905	Sb01g019730.1	BRADI3G28340.1	MLOC_77976.1	Sevir.9G227100
25	Cauliflower (BoCAL)	Inflorescence_morphology	development	Cauliflower	dicot	ENOG411BFD5	N	AT5G60910.1,AT1G69120.1,AT1G26310.1	GLYMA06G22650.2,GLYMA04G31847.1	Bra011021.1-P,Bra004361,Bra029347	Solyc03g114830.2.1	LOC_Os03g54160.1,LOC_Os07g01820.1	BGIOSGA024961-PA,BGIOSGA009798-PA	Si030802m	GRMZM2G148693,GRMZM2G032339,GRMZM2G553379,GRMZM2G072582	Sb01g007790.1,Sb02g001090.1	BRADI1G59250.1,BRADI1G08340.1	MLOC_61901.1	Sevir.9G087100
26	Purple (Pr)	Plant_color	color_texture_flavor_and_fragrance	Cauliflower	dicot	ENOG411BYE1	N	AT1G66390.1	GLYMA18G41520.1,GLYMA07G16980.1	Bra001917.1-P
27	teosinte glume architecture (tga1)	Cupule_retraction	development	Zea_mays	monocot	ENOG410YD0Z	Y					LOC_Os08g41940.1	BGIOSGA029051-PA	Si013747m	GRMZM2G101511	Sb07g026220.1	BRADI3G41250.1	MLOC_37841.2	Sevir.6G230400
28	ZmCCT (orthologous to rice Ghd7)	Flowering_time	development	Zea_mays	monocot	COG5641	Y					LOC_Os07g15770.1	BGIOSGA024502-PA	Si011920m,Si039184m		Sb06g000570.1		MLOC_77036.2	Sevir.7G031000, Sevir.9G019800
29	Rap2.7 (vgt1)	Flowering_time	development	Zea_mays	monocot	ENOG410YD13	Y	AT2G28550.3,AT5G67180.1	GLYMA03G33470.1,GLYMA11G15650.4,GLYMA12G07800.1,GLYMA13G40470.1,GLYMA15G04930.1,GLYMA19G36200.2	Bra000487.1-P,Bra011939.1-P,Bra012139.1-P	Solyc02g064960.2.1,Solyc06g075510.2.1,Solyc09g007260.2.1,Solyc10g084340.1.1,Solyc11g072600.1.1				GRMZM2G700665
30	zfl2	Flowering_time	development	Zea_mays	monocot	ENOG4110P9Q	Y	AT5G61850.1	GLYMA04G37900.2,GLYMA06G17170.1	Bra019619.1-P,Bra029305.1-P	Solyc03g118160.1.1	LOC_Os04g51000.1	BGIOSGA014428-PA	Si011756m	GRMZM2G180190	Sb06g027340.1	BRADI5G20340.1	MLOC_14305.1	Sevir.7G234001
31	sugary 1 (su1) = isoamylase-type starch-debranching enzymes	Fruit_sugar_content	color_texture_flavor_and_fragrance	Zea_mays	monocot	COG1523	Y	AT2G39930.1	GLYMA05G36370.1,GLYMA08G03210.1	Bra005001.1-P	Solyc07g014590.2.1	LOC_Os08g40930.1	BGIOSGA026650-PA	Si013277m	GRMZM2G138060	Sb07g027200.1	BRADI3G40410.1	MLOC_48036.1	Sevir.6G218500
32	opaque2 (O2)	Lysine_content_(endosperm)	color_texture_flavor_and_fragrance	Zea_mays	monocot	ENOG41108S0	Y							Si029970m	GRMZM2G015534	Sb02g004590.1,Sb02g004610.1			Sevir.9G055100
33	MATE1/ZmMATE1	Metal_tolerance	abiotic_stress_response	Zea_mays	monocot	COG0534	Y					LOC_Os10g13940.1	BGIOSGA032668-PA	Si035321m	GRMZM5G870170	Sb07g001800.1	BRADI3G23150.1	MLOC_36698.5	Sevir.9G203100
34	DGAT1-2	Oil_composition_and_yield	color_texture_flavor_and_fragrance	Zea_mays	monocot	COG5056	Y				Solyc07g040740.2.1,Solyc12g008970.1.1	LOC_Os06g36800.1		Si006298m	GRMZM2G169089	Sb10g022270.1	BRADI1G37750.1	MLOC_15432.3	Sevir.4G250800
35	HM1 = HC toxin reductase (HCTR)	Pathogen_resistance	biotic_stress_response	Zea_mays	monocot	COG0451	Y		GLYMA03G41740.1,GLYMA19G44360.1,GLYMA19G44370.1		Solyc04g015590.2.1,Solyc10g009500.2.1,Solyc10g009540.1.1	LOC_Os06g44170.1	BGIOSGA020770-PA	Si006774m	GRMZM5G881887	Sb07g023130.1	BRADI1G31020.1	MLOC_58028.1
36	HM2 = HC toxin reductase (HCTR)	Pathogen_resistance	biotic_stress_response	Zea_mays	monocot	COG0451	Y		GLYMA03G41740.1,GLYMA19G44360.1,GLYMA19G44370.1		Solyc04g015590.2.1,Solyc10g009500.2.1,Solyc10g009540.1.1	LOC_Os06g44170.1	BGIOSGA020770-PA		GRMZM2G086773	Sb10g025740.1	BRADI1G31020.1	MLOC_58028.1
37	Lysine histidine transporter 1	Pathogen_resistance	biotic_stress_response	Zea_mays	monocot	COG0814	Y					LOC_Os08g03350.1	BGIOSGA027915-PA	Si013740m	GRMZM2G046743	Sb07g002230.1	BRADI3G14140.1	MLOC_16705.3	Sevir.6G079000
38	Rp1-D	Pathogen_resistance	biotic_stress_response	Zea_mays	monocot	COG4886	N								AAD47197.1
39	Rp3	Pathogen_resistance	biotic_stress_response	Zea_mays	monocot	COG4886	N								Zm00001d041362
40	Barren inflorescence2 (BIF2)	Plant_and_inflorescence_architecture	development	Zea_mays	monocot	ENOG410XQ0C	Y					LOC_Os12g42020.1	BGIOSGA034681-PA,BGIOSGA037790-PA	Si021826m	GRMZM2G171822	Sb08g021520.1	BRADI4G01700.1	MLOC_71203.1	Sevir.9G156500
41	teosinte branched 1 (tb1)	Plant_and_inflorescence_architecture	development	Zea_mays	monocot	ENOG410Z0VC	Y					LOC_Os03g49880.1	BGIOSGA013417-PA	Si038692m	Zm00001d033673		BRADI1G11060.1	MLOC_70116.1	Sevir.9G122200
42	colored1 (r1)	Plant_coloration_(seeds)	color_texture_flavor_and_fragrance	Zea_mays	monocot	ENOG410Z2WK	Y	AT1G63650.1,AT4G00480.2,AT5G41315.1	GLYMA03G01180.1,GLYMA05G37770.1,GLYMA07G07740.1,GLYMA08G01810.1	Bra000970.1-P,Bra025508.1-P,Bra027653.1-P,Bra027796.1-P,Bra037343.1-P	Solyc08g081140.2.1	LOC_Os04g47040.1,LOC_Os04g47059.1,LOC_Os04g47080.1	BGIOSGA014565-PA,BGIOSGA014566-PA,BGIOSGA014567-PA,BGIOSGA015472-PA	Si000845m,Si012401m	GRMZM5G822829	Sb06g016380.1,Sb06g025020.1,Sb06g025040.1,Sb06g025060.1		MLOC_38470.1	Sevir.5G416700, Sevir.7G207500
43	dwarf-8 (d8)	Plant_stature,_dwarfism	development	Zea_mays	monocot	ENOG410YBFY	Y	AT1G14920.1,AT2G01570.1,AT3G03450.1,AT5G17490.1	GLYMA05G27190.1,GLYMA08G10140.1,GLYMA11G33720.1,GLYMA18G04500.1	Bra013973.1-P,Bra024875.1-P,Bra031991.1-P	Solyc11g011260.1.1	LOC_Os03g49990.1	BGIOSGA013420-PA	Si039400m	GRMZM2G024973,GRMZM2G144744	Sb01g010660.1	BRADI1G11090.1	MLOC_67940.1	Sevir.9G121800
44	shrunken-2 (Sh2) = endosperm ADP-glucose pyrophosphorylase large subunit	Seed_aspect	color_texture_flavor_and_fragrance	Zea_mays	monocot	COG0448	Y	AT2G21590.1,AT4G39210.1	GLYMA04G01350.2,GLYMA06G01380.1,GLYMA11G12410.1,GLYMA12G04630.1	Bra030291.1-P,Bra033604.1-P	Solyc01g109790.2.1	LOC_Os01g44220.1	BGIOSGA004052-PA	Si001040m	GRMZM2G429899	Sb03g028850.1			Sevir.5G244900
45	B1	Seed_color	color_texture_flavor_and_fragrance	Zea_mays	monocot	ENOG410Z2WK	Y	AT1G63650.1,AT4G00480.2,AT5G41315.1	GLYMA03G01180.1,GLYMA05G37770.1,GLYMA07G07740.1,GLYMA08G01810.1	Bra000970.1-P,Bra025508.1-P,Bra027653.1-P,Bra027796.1-P,Bra037343.1-P	Solyc08g081140.2.1	LOC_Os04g47040.1,LOC_Os04g47059.1,LOC_Os04g47080.1	BGIOSGA014565-PA,BGIOSGA014566-PA,BGIOSGA014567-PA,BGIOSGA015472-PA	Si000845m,Si012401m	GRMZM2G172795	Sb06g016380.1,Sb06g025020.1,Sb06g025040.1,Sb06g025060.1		MLOC_38470.1	Sevir.5G416700, Sevir.7G207500
46	c1	Seed_color	color_texture_flavor_and_fragrance	Zea_mays	monocot	COG5147	Y	AT5G35550.1		Bra035532.1-P		LOC_Os06g10350.1	BGIOSGA022508-PA		GRMZM2G005066	Sb10g006700.1
47	pericarp color1 (P1)	Seed_color	color_texture_flavor_and_fragrance	Zea_mays	monocot	COG5147	Y		GLYMA02G01740.1			LOC_Os03g19120.1	BGIOSGA010900-PA	Si039538m	Zm00001d028850	Sb01g037670.1		MLOC_57220.1	Sevir.9G436200
48	phytoene synthase (Y1)	Seed_color_(carotenoids)	color_texture_flavor_and_fragrance	Zea_mays	monocot	COG1562	Y		GLYMA11G36420.2,GLYMA18G15451.1			LOC_Os06g51290.1	BGIOSGA020499-PA	Si006539m	GRMZM2G300348	Sb10g031020.1	BRADI1G29590.1	MLOC_69078.8	Sevir.4G300900
49	Shattering1 (ZmSh1-1)	Seed_shattering	development	Zea_mays	monocot	ENOG410YHWI	Y	AT1G08465.1	GLYMA06G46560.1,GLYMA12G10210.3,GLYMA13G38750.1	Bra018624.1-P,Bra030728.1-P,Bra031629.1-P	Solyc06g073920.2.1,Solyc11g071810.1.1		BGIOSGA037817-PA		GRMZM2G116646
50	Shattering1 (ZmSh1-5.1/ ZmSh1-5.2)	Seed_shattering	development	Zea_mays	monocot	ENOG410YHWI	Y	AT1G08465.1	GLYMA06G46560.1,GLYMA12G10210.3,GLYMA13G38750.1	Bra018624.1-P,Bra030728.1-P,Bra031629.1-P	Solyc06g073920.2.1,Solyc11g071810.1.1	LOC_Os03g44710.1	BGIOSGA037817-PA		GRMZM2G074124		BRADI1G13570.1	MLOC_70676.2
51	brittle endosperm2 (Bt2)	Sweet_and_brittle_seed	color_texture_flavor_and_fragrance	Zea_mays	monocot	COG0448	Y		GLYMA02G47460.1,GLYMA14G01290.1	Bra015135.1-P	Solyc12g011120.1.1				GRMZM2G068506
52	L6	Pathogen_resistance	biotic_stress_response	Flax	dicot	ENOG411BEFH	N	AT1G69550,AT3G25510	GLYMA12G15850.2,GLYMA06G41430.1,GLYMA12G16450.1,GLYMA06G40710.1,GLYMA06G40950.1,GLYMA06G40980.1,GLYMA06G41241.1,GLYMA06G43850.1,GLYMA06G41290.2,GLYMA06G40690.1,GLYMA06G41380.2,GLYMA06G40780.1	Bra019409,Bra020861	Solyc05G006630.2.1,Solyc11G011090.1.1			Si025838m,Si026026m		Sb05g025450.1,Sb05g025470.1	BRADI2G41920.1	MLOC_7267.3,MLOC_77255.1
53	M	Pathogen_resistance	biotic_stress_response	Flax	dicot	ENOG411BMW1	N		GLYMA01G04200.2,GLYMA15G13290.1,GLYMA02G03010.2,GLYMA15G21140.1,GLYMA01G08640.1,GLYMA02G03520.1,GLYMA12G14700.1,GLYMA09G02401.1,GLYMA09G02420.1,GLYMA15G13300.2		Solyc09G064610.2.1	LOC_Os05g31550.1
54	VvMYBA1	Plant_coloration_(fruit)	color_texture_flavor_and_fragrance	Grapevine	dicot	COG5147	Y	AT1G56650.1,AT1G66370.1,AT1G66380.1,AT1G66390.1	GLYMA07G16980.1,GLYMA18G41520.1	Bra001917.1-P,Bra004162.1-P,Bra039763.1-P	Solyc10g086250.1.1,Solyc10g086260.1.1,Solyc10g086270.1.1,Solyc10g086290.1.1
55	VvMYBA2	Plant_coloration_(fruit)	color_texture_flavor_and_fragrance	Grapevine	dicot	COG5147	Y	AT1G56650.1,AT1G66370.1,AT1G66380.1,AT1G66390.1	GLYMA07G16980.1,GLYMA18G41520.1	Bra001917.1-P,Bra004162.1-P,Bra039763.1-P	Solyc10g086250.1.1,Solyc10g086260.1.1,Solyc10g086270.1.1,Solyc10g086290.1.1
56	VvMYBA3	Plant_coloration_(fruit)	color_texture_flavor_and_fragrance	Grapevine	dicot	COG5147	Y	AT1G56650.1,AT1G66370.1,AT1G66380.1,AT1G66390.2	GLYMA07G16980.1,GLYMA18G41520.2	Bra001917.1-P,Bra004162.1-P,Bra039763.1-P	Solyc10g086250.1.1,Solyc10g086260.1.1,Solyc10g086270.1.1,Solyc10g086290.1.1
57	phosphoenolpyruvate carboxylase (PEPC)	C3/C4_photosynthesis_-_enzymatic_properties_	other	Alloteropsis	monocot	ENOG410JW91	N							Si005789m	GRMZM2G083841	Sb10g021330.1			Sevir.5G145500
58	RAY1/RAY2	Plant_morphology_(flowers)	development	Groundsel	dicot	ENOG410J0IG	N	AT3G18550.1,AT1G68800.1	GLYMA04G22407.1,GLYMA06G23410.2	Bra001710.1-P,Bra037579.1-P,Bra038350.1-P	Solyc04g006980.1.1,Solyc06g069240.1.1,Solyc03g119770.2.1,Solyc03g119770.2.1	LOC_Os09g24480.1,LOC_Os03g49880.1	BGIOSGA013417-PA,BGIOSGA030744-PA	Si038692m,Si033183m	GRMZM2G110242,GRMZM2G064628	Sb01g010690.1,Sb02g024450.1	BRADI4G29980.1,BRADI1G11060.1	MLOC_70116.1,MLOC_4614.1	Sevir.9G122200, Sevir.6G163100
59	dihydroflavonol reductase (DFR)	Plant_coloration_(flowers)	development	Iochroma	dicot	ENOG411BCKA	N	AT5G42800.1	GLYMA02G18380.1,GLYMA17G37060.1,GLYMA14G07940.1	Bra027457.1-P	Solyc02g085020.2.1	LOC_Os01g44260.1	BGIOSGA004056-PA	Si005186m	GRMZM2G026930,GRMZM2G013726	Sb03g028880.1,Sb04g004290.1	BRADI2G44480.1	MLOC_65788.2	Sevir.5G245400
60	flavonoid 3',5'-hydroxylase (F3'5'H)	Plant_coloration_(flowers)	development	Iochroma	dicot	ENOG411BNKG	N		GLYMA20G08160.1,GLYMA13G04210.1		Solyc11G066580.1.1	LOC_Os03g25150		Si035183m	GRMZM2G119067	Sb01g034470.1,Sb01g034460.1	BRADI2G11620.1,BRADI1G61577.1		Sevir.9G395800
61	RGC2/Dm3	Pathogen_resistance	biotic_stress_response	Lettuce	dicot	ENOG411BYYM	N		GLYMA15G39596.1,GLYMA07G06914.1,GLYMA07G07100.2,GLYMA18G46050.5,GLYMA07G08445.1,GLYMA16G03550.2,GLYMA07G07110.1,GLYMA06G39990.1,GLYMA07G07015.1,GLYMA13G33536.1,GLYMA07G07150.1,GLYMA07G07075.1,GLYMA16G03515.1,GLYMA07G06866.1,GLYMA01G10254.1,GLYMA18G46026.1		Solyc10G055080.1.1,Solyc04G005540.2.1,Solyc04G005550.1.1,Solyc12G044190.1.1	LOC_Os11g29090.1	BGIOSGA033999-PA,BGIOSGA034001-PA
62	Waxy /GBSS	Amylose_content	color_texture_flavor_and_fragrance	Setaria_italica	monocot	COG0297	Y	AT1G32900.1	GLYMA07G05580.3,GLYMA10G31540.3,GLYMA16G02110.3,GLYMA20G36040.1	Bra010189.1-P		LOC_Os06g04200.1	BGIOSGA022241-PA	Si006103m	GRMZM2G024993	Sb10g002140.1	BRADI1G50090.1	MLOC_64657.2	Sevir.4G021900
63	flavonoid 3-hydroxylase (F3'H)	Plant_coloration_(flowers)	color_texture_flavor_and_fragrance	Morning_glory	dicot	ENOG411BJJ5	N	AT3G51240.1	GLYMA02G05450.1,GLYMA02G05470.1,GLYMA16G23880.1	Bra036828.1-P	Solyc02g083860.2.1	LOC_Os04g56700.1	BGIOSGA014166-PA	Si022356m	GRMZM2G062396	Sb06g031790.1	BRADI5G25050.1	MLOC_64248.1	Sevir.3G027600
64	Frigida (BnaA.FRI.a)	Flowering_time	development	Oilseed_rape	dicot	ENOG410J269	N	AT4G00650.1	GLYMA04G38071.1,GLYMA06G17005.1	Bra029192.1-P,Bra035723.1-P	Solyc12G042440.1.1,Solyc06G074450.1.1,Solyc03G117930.2.1	LOC_Os03g63440.1	BGIOSGA013955-PA	Si035611m	GRMZM2G021642	Sb01g001030.1	BRADI1G01520.1	MLOC_27941.1	Sevir.9G008900
65	FAD2 (BnaA.FAD2.a)	Oil_composition_and_yield	color_texture_flavor_and_fragrance	Oilseed_rape	dicot	ENOG410IFN9	N	AT3G12120.1	GLYMA09G17170.1,GLYMA03G30070.3,GLYMA10G42470.1,GLYMA19G32940.1,GLYMA02G39230.1	Bra034777.1-P	Solyc03g058430.1.1,Solyc01g006430.2.1,Solyc12g049030.1.1,Solyc04g040120.1.1,Solyc12g100250.1.1	LOC_Os07g23410.1,LOC_Os12g01370.1,LOC_Os02g48560.1,LOC_Os07g23430.1,LOC_Os11g01340.4	BGIOSGA037887-PA,BGIOSGA036813-PA,BGIOSGA024410-PA,BGIOSGA025568-PA,BGIOSGA005733-PA	Si026445m,Si008635m,Si017479m,Si011848m	GRMZM2G354558,GRMZM2G161792,GRMZM2G169240,GRMZM2G064701,GRMZM2G169261	Sb04g029920.1,Sb02g003840.1,Sb08g000460.1,Sb05g000400.1,Sb04g029900.1	BRADI4G45037.1,BRADI3G53370.1	MLOC_74642.1,MLOC_60549.1	Sevir.8G002200, Sevir.4G167600, Sevir.1G301600, Sevir.9G445400
66	Ruby	Plant_color_(fruit,_cold-dependent)	color_texture_flavor_and_fragrance	Orange	dicot	ENOG411BRS3	N	AT1G66370.1	GLYMA09G36983.1,GLYMA19G02980.2,GLYMA09G36966.1,GLYMA18G49690.1,GLYMA09G37010.2,GLYMA18G49670.2	Bra004162.1-P,Bra039763.1-P	Solyc10g086250.1.1,Solyc10g086260.1.1,Solyc10g086270.1.1,Solyc10g086290.1.1
67	MLO1	Pathogen_resistance	biotic_stress_response	Pea	dicot	ENOG410IJ5H	N	AT3G45290.1	GLYMA19G36370.2,GLYMA03G33660.2		Solyc06G010010.1.1
68	flavonoid 3',5'-hydroxylase (F3'5'H)	Plant_coloration_(flowers)	color_texture_flavor_and_fragrance	Pea	dicot	ENOG411BNKG	N		GLYMA20G08160.1,GLYMA13G04210.1		Solyc11G066580.1.1	LOC_Os03g25150		Si035183m	GRMZM2G119067	Sb01g034470.1,Sb01g034460.1	BRADI2G11620.1,BRADI1G61577.1		Sevir.9G395800
69	PsbHLH	Plant_coloration_(flowers)	color_texture_flavor_and_fragrance	Pea	dicot	ENOG410IMK5	N	AT4G09820.1	GLYMA02G16670.2,GLYMA19G33770.1,GLYMA03G30940.2,GLYMA10G03140.2	Bra037887.1-P	Solyc09G065100.1.1	LOC_Os07g11020.1	BGIOSGA025388-PA	Si029106m	GRMZM2G042733	Sb02g006390.1	BRADI1G54070.1	MLOC_6900.1	Sevir.2G085200
70	Starch branching enzyme (SBEI)	Starch_structure,_seed_aspect	color_texture_flavor_and_fragrance	Pea	dicot	KOG0470	N	AT5G03650.1,AT3G20440.2,AT2G36390.1	GLYMA03G35020.1,GLYMA06G02051.1,GLYMA18G10385.1,GLYMA04G01950.2,GLYMA19G37750.1	Bra017241.1-P,Bra014108.1-P,Bra005269.1-P,Bra035782.1-P,Bra009521.1-P	Solyc11g008040.1.1,Solyc04g082400.2.1,Solyc09g009190.2.1,Solyc07g064830.2.1	LOC_Os04g33460.1,LOC_Os02g32660.1,LOC_Os06g51084.1,LOC_Os06g26234.1	BGIOSGA040526-PA,BGIOSGA006344-PA	Si005911m,Si009312m,Si016350m,Si021452m,Si008087m	GRMZM2G088753,GRMZM2G005298,GRMZM2G169073,GRMZM2G032628	Sb10g030773.1,Sb06g015360.1,Sb03g027310.1,Sb10g030776.1	BRADI1G41970.1,BRADI5G09170.1,BRADI3G44760.1,BRADI1G29850.1	MLOC_56800.2,MLOC_43405.2,MLOC_63722.1	Sevir.4G298600, Sevir.7G096400, Sevir.7G096400, Sevir.3G260100, Sevir.4G159200
71	an2-like	Plant_color_(fruit)	color_texture_flavor_and_fragrance	Pepper	Magnoliids	ENOG411BRS3	N	AT1G66370.1	GLYMA09G36983.1,GLYMA19G02980.2,GLYMA09G36966.1,GLYMA18G49690.1,GLYMA09G37010.2,GLYMA18G49670.2	Bra004162.1-P,Bra039763.1-P	Solyc10g086250.1.1,Solyc10g086260.1.1,Solyc10g086270.1.1,Solyc10g086290.1.1
72	ODORANT1	Fragrance	color_texture_flavor_and_fragrance	Petunia	dicot	ENOG411BEE4	N	AT4G22680.1,AT4G12350.1	GLYMA11G03300.1,GLYMA05G03780.1,GLYMA01G42050.1,GLYMA17G14291.1	Bra019368.1-P,Bra020837.1-P,Bra013633.1-P	Solyc08G079270.2.1	LOC_Os09g36250.1	BGIOSGA026529-PA,BGIOSGA029380-PA	Si030750m,Si015412m	GRMZM2G104551,GRMZM2G037650,GRMZM2G138427	Sb02g030900.1,Sb07g024970.1	BRADI3G42430.1,BRADI4G36210.1	MLOC_6696.1	Sevir.6G244700, Sevir.6G244700
73	flavonoid 3-hydroxylase (F3'H)	Plant_coloration_(flowers)	color_texture_flavor_and_fragrance	Petunia	dicot	ENOG411BJJ5	N	AT3G51240.1	GLYMA02G05450.1,GLYMA02G05470.1,GLYMA16G23880.1	Bra036828.1-P	Solyc02g083860.2.1	LOC_Os04g56700.1	BGIOSGA014166-PA	Si022356m	GRMZM2G062396	Sb06g031790.1	BRADI5G25050.1	MLOC_64248.1	Sevir.3G027600
74	anthocyanin2 (an2)	Plant_coloration_(flowers)	color_texture_flavor_and_fragrance	Petunia	dicot	ENOG411BRS3	N	AT1G66370.1	GLYMA09G36983.1,GLYMA19G02980.2,GLYMA09G36966.1,GLYMA18G49690.1,GLYMA09G37010.2,GLYMA18G49670.2	Bra004162.1-P,Bra039763.1-P	Solyc10g086250.1.1,Solyc10g086260.1.1,Solyc10g086270.1.1,Solyc10g086290.1.1
75	an2-like (Stan2)	Plant_color_(tuber_skin)	color_texture_flavor_and_fragrance	Potato	dicot	COG5147	Y	AT1G56650.1,AT1G66370.1,AT1G66380.1,AT1G66390.2	GLYMA07G16980.1,GLYMA18G41520.2	Bra001917.1-P,Bra004162.1-P,Bra039763.1-P
76	dihydroflavonol reductase (DFR)	Plant_coloration_(tuber_skin)	color_texture_flavor_and_fragrance	Potato	dicot	COG0451	Y	AT5G42800.1		Bra027457.1-P	Solyc02g085020.2.1
77	flavonoid 3',5'-hydroxylase (F3'5'H)	Plant_coloration_(tuber_skin)	color_texture_flavor_and_fragrance	Potato	dicot	ENOG411BNKG	N		GLYMA20G08160.1,GLYMA13G04210.1		Solyc11G066580.1.1	LOC_Os03g25150		Si035183m	GRMZM2G119067	Sb01g034470.1,Sb01g034460.1	BRADI2G11620.1,BRADI1G61577.1		Sevir.9G395800
78	CCR1	Fibre_content	color_texture_flavor_and_fragrance	Oilseed_rape	dicot	ENOG411BGP4	N	AT5G46080.1	GLYMA13G24330.1,GLYMA13G30810.1,GLYMA07G32240.1,GLYMA15G08470.1	Bra025041.1-P,Bra017580.1-P	Solyc10g008960.1.1	LOC_Os08g28890.1	BGIOSGA028572-PA,BGIOSGA028571-PA	Si015751m	GRMZM2G154114	Sb07g019170.1	BRADI3G35130.1		Sevir.6G100900
79	RPM1	Pathogen_resistance	biotic_stress_response	Oilseed_rape	dicot	ENOG411BG27	N	AT3G07040.1	GLYMA09G34360.2,GLYMA06G46830.1,GLYMA01G01420.1,GLYMA20G08340.1,GLYMA06G46800.2,GLYMA09G34381.1,GLYMA06G46810.1,GLYMA08G41800.2,GLYMA01G01400.1			LOC_Os07g08890.1,LOC_Os04g21890.1,LOC_Os07g40810.1,LOC_Os10g21400.1,LOC_Os10g04674.1,LOC_Os04g46300.1,LOC_Os10g07534.1,LOC_Os08g32880.1,LOC_Os06g48520.1	BGIOSGA032578-PA,BGIOSGA016070-PA,BGIOSGA028698-PA,BGIOSGA023959-PA	Si009314m,Si008124m,Si005193m,Si000229m,Si031978m,Si005798m,Si028865m,Si005799m	GRMZM2G162098,GRMZM2G105428,GRMZM2G077937,GRMZM2G091672,GRMZM2G091696	Sb01g028490.1,Sb02g038425.1,Sb10g028730.1,Sb02g004900.1,Sb06g024420.1,Sb03g036150.1,Sb10g028720.1	BRADI4G14697.1,BRADI4G09247.1,BRADI5G01167.1,BRADI1G22500.1,BRADI5G17527.1	MLOC_67526.2,MLOC_1192.1,MLOC_20874.1,MLOC_56324.1,MLOC_17579.2	Sevir.7G199900, Sevir.5G341600, Sevir.5G053300, Sevir.2G389700, Sevir.2G065300, Sevir.4G256900
80	Waxy /GBSS	Amylose_content_(Glutinous_rice)	color_texture_flavor_and_fragrance	Oryza_sativa_Japonica	monocot	COG0297	Y	AT1G32900.1	GLYMA07G05580.3,GLYMA10G31540.3,GLYMA16G02110.3,GLYMA20G36040.1	Bra010189.1-P	Solyc08g083320.2.1	LOC_Os06g04200	BGIOSGA022241-PA	Si006103m	GRMZM2G024993	Sb10g002140.1	BRADI1G50090.1	MLOC_64657.2	Sevir.4G021900
81	S5	F1_female_serility	development	Oryza_sativa_Japonica	monocot	ENOG410XNV7	N					LOC_Os06g11010.1	BGIOSGA022546-PA		GRMZM2G370905
82	SaM	F1_male_sterility	development	Oryza_sativa_Japonica	monocot		N					LOC_Os01g39680
83	SaF	F1_male_sterility	development	Oryza_sativa_Japonica	monocot	ENOG411148C	N	AT3G49020.1		Bra025236.1-P		LOC_Os01g39670.1
84	Ehd1 (Response regulator)	Flowering_time	development	Oryza_sativa_Japonica	monocot	COG5641	Y					LOC_Os10g32600	BGIOSGA031750-PA	Si039992m	GRMZM2G379656	Sb01g019980.1			Sevir.9G230500
85	EARLY FLOWERING 3/Hd17	Flowering_time	development	Oryza_sativa_Japonica	monocot	COG5641	Y	AT3G21320.1	GLYMA07G01601.1,GLYMA08G21115.1	Bra001825.1-P,Bra023887.1-P,Bra031274.1-P	Solyc06g062480.2.1	LOC_Os06g05060	BGIOSGA021953-PA	Si000440m	GRMZM2G045275	Sb03g025560.1			Sevir.5G206400
86	Hd1	Flowering_time	development	Oryza_sativa_Japonica	monocot	COG5641	Y	AT3G02380.1,AT5G15840.1,AT5G15850.1	GLYMA08G28370.1,GLYMA13G07030.1,GLYMA18G51320.1,GLYMA19G05170.1	Bra001043.1-P,Bra008668.1-P,Bra008669.1-P,Bra021464.1-P,Bra023541.1-P	Solyc02g089520.1.1,Solyc02g089540.2.1	LOC_Os06g16370.1	BGIOSGA022685-PA		GRMZM2G405368	Sb10g010050.1	BRADI1G43670.1
87	Hd6a	Flowering_time	development	Oryza_sativa_Japonica	monocot	ENOG410XNPP	Y					LOC_Os03g55389	BGIOSGA009770-PA	Si035743m	GRMZM2G047855,GRMZM2G141903	Sb01g007270.1	BRADI1G07810.1	MLOC_55943.1	Sevir.9G080100
88	se5	Flowering_time	development	Oryza_sativa_Japonica	monocot	COG5398	Y					LOC_Os06g40080	BGIOSGA020927-PA	Si007047m,Si008723m	AY530952.1_FGP002,GRMZM2G043277,GRMZM2G049656,GRMZM2G101004,GRMZM2G103402,GRMZM2G111802,GRMZM2G131950,GRMZM2G157936,GRMZM2G170953,GRMZM2G309145,GRMZM2G450880,GRMZM2G463449	Sb10g023510.1,Sb10g023550.1	BRADI1G36640.1	MLOC_21909.1	Sevir.4G234000
89	Ghd7	Flowering_time,_Plant_morphology_(inflorescence)	development	Oryza_sativa_Japonica	monocot	COG5641	Y					LOC_Os07g15770	BGIOSGA024502-PA	Si011920m,Si039184m	GRMZM2G381691	Sb06g000570.1		MLOC_77036.2	Sevir.7G031000, Sevir.9G019800
90	BADH2	Fragrance	color_texture_flavor_and_fragrance	Oryza_sativa_Japonica	monocot	COG1012	Y	AT1G74920.1,AT3G48170.1	GLYMA05G01770.1,GLYMA06G19820.1,GLYMA17G10120.1	Bra003781.1-P,Bra019528.1-P	Solyc03g113800.2.1,Solyc06g071290.2.1	LOC_Os08g32870	BGIOSGA028697-PA	Si013592m	GRMZM2G013214,GRMZM2G016189,GRMZM2G146754,GRMZM2G350397,GRMZM2G365483	Sb07g020650.1	BRADI3G36150.1	MLOC_1705.1	Sevir.6G157300
91	Alk / Starch Synthase II	Grain_cooking_texture	other	Oryza_sativa_Japonica	monocot	COG0297	Y					LOC_Os06g12450	BGIOSGA022586-PA	Si005900m	GRMZM2G348551	Sb10g008200.1	BRADI1G45130.1	MLOC_69670.1	Sevir.4G099100
92	GL3.1	Grain_size	development	Oryza_sativa_Japonica	monocot	COG0639	Y	AT1G08420.1,AT2G27210.1	GLYMA11G18090.1,GLYMA11G20010.1,GLYMA12G10120.1,GLYMA12G31540.1,GLYMA13G38850.1	Bra030724.1-P,Bra031626.1-P,Bra034332.1-P	Solyc01g009280.2.1,Solyc06g073960.2.1,Solyc11g071920.1.1	LOC_Os03g44500.1	BGIOSGA010144-PA	Si034069m	GRMZM2G148539	Sb01g013460.1	BRADI1G13710.1	MLOC_37399.1	Sevir.9G154900
93	GS3	Grain_size	development	Oryza_sativa_Japonica	monocot	ENOG410YVBK	Y	AT5G20635.1	GLYMA09G08131.1,GLYMA13G17071.1,GLYMA15G19631.1,GLYMA17G05640.1		Solyc07g041980.2.1	LOC_Os09g26999.2	BGIOSGA030843-PA	Si033308m	GRMZM2G001660,GRMZM2G172320	Sb02g025860.1	BRADI4G31417.1		Sevir.6G177400
94	GS5	Grain_size	development	Oryza_sativa_Japonica	monocot	COG2939	Y	AT3G17180.1	GLYMA07G36500.4,GLYMA17G04110.1,GLYMA17G04120.1	Bra021230.1-P	Solyc12g099160.1.1	LOC_Os05g06660	BGIOSGA018771-PA	Si010037m		Sb09g004510.1	BRADI2G34850.1		Sevir.7G280900
95	GW2	Grain_size	development	Oryza_sativa_Japonica	monocot	ENOG4111M8N	Y	AT1G17145.1,AT1G78420.1	GLYMA13G33260.1,GLYMA15G39830.2	Bra008360.1-P,Bra025999.1-P,Bra035036.1-P	Solyc07g056630.2.1	LOC_Os02g14720	BGIOSGA007870-PA	Si017266m	GRMZM2G007288,GRMZM2G170088	Sb04g008760.1	BRADI3G09270.1	MLOC_59426.1	Sevir.1G020300
96	OsPPKL1/qGL3	Grain_size	development	Oryza_sativa_Japonica	monocot	COG0639	Y	AT1G08420.1,AT2G27210.1	GLYMA11G18090.1,GLYMA11G20010.1,GLYMA12G10120.1,GLYMA12G31540.1,GLYMA13G38850.1	Bra030724.1-P,Bra031626.1-P,Bra034332.1-P	Solyc01g009280.2.1,Solyc06g073960.2.1,Solyc11g071920.1.1	LOC_Os03g44500	BGIOSGA010144-PA	Si034069m	GRMZM2G148539	Sb01g013460.1	BRADI1G13710.1	MLOC_37399.1	Sevir.9G154900
97	qSW5	Grain_size	development	Oryza_sativa_Japonica	monocot	ENOG410YC0Z	Y	AT3G16490.1	GLYMA01G01030.1,GLYMA05G35920.1,GLYMA07G01760.1,GLYMA07G14910.2,GLYMA08G03710.1,GLYMA08G21430.2	Bra001633.1-P,Bra021181.1-P,Bra022163.1-P	Solyc06g066430.2.1,Solyc12g008520.1.1	LOC_Os05g09520	BGIOSGA019303-PA
98	OsSPL16	Grain_size_and_shape	development	Oryza_sativa_Japonica	monocot	ENOG410YD0Z	Y					LOC_Os08g41940	BGIOSGA029051-PA	Si013747m	AC233751.1_FGP002,GRMZM2G101511	Sb07g026220.1	BRADI3G41250.1	MLOC_37841.2	Sevir.6G230400
99	GRAIN INCOMPLETE FILLING 1	Grain_weight	development	Oryza_sativa_Japonica	monocot	COG1621	Y	AT2G36190.1,AT3G52600.1	GLYMA01G15883.1,GLYMA03G35520.1,GLYMA10G08670.2,GLYMA19G38160.1,GLYMA20G03553.1,GLYMA20G03580.2,GLYMA20G03620.2,GLYMA20G03640.2	Bra017257.1-P,Bra023053.1-P,Bra033419.1-P	Solyc09g010080.2.1,Solyc09g010090.2.1,Solyc10g083290.1.1,Solyc10g083300.1.1,Solyc10g085360.1.1,Solyc10g085640.1.1,Solyc10g085650.1.1	LOC_Os04g33740	BGIOSGA016364-PA	Si009687m,Si009691m,Si009702m	GRMZM2G095725,GRMZM2G119689	Sb0067s002110.1,Sb0067s002130.1,Sb0067s002240.1	BRADI5G09420.1	MLOC_56998.3	Sevir.7G099300
100	DEP1	Grain_yield	development	Oryza_sativa_Japonica	monocot	ENOG410YVBK	Y	AT5G20635.1	GLYMA09G08131.1,GLYMA13G17071.1,GLYMA15G19631.1,GLYMA17G05640.1		Solyc07g041980.2.1	LOC_Os09g26999	BGIOSGA030843-PA	Si033308m	GRMZM2G001660,GRMZM2G172320	Sb02g025860.1	BRADI4G31417.1		Sevir.6G177400
101	OsCKX2=Gn1a	Grain_yield	development	Oryza_sativa_Japonica	monocot	COG0277	Y	AT2G19500.1,AT4G29740.2,AT5G56970.1	GLYMA09G07190.1,GLYMA09G07206.1,GLYMA09G07360.1,GLYMA13G16420.2,GLYMA13G16430.1,GLYMA15G18560.1,GLYMA17G06220.1,GLYMA17G06230.1	Bra002777.1-P,Bra024135.1-P,Bra035640.1-P,Bra036719.1-P,Bra040677.1-P	Solyc10g017990.1.1,Solyc12g008900.1.1,Solyc12g008920.1.1	LOC_Os01g10110	BGIOSGA002195-PA	Si001500m	GRMZM2G325612	Sb03g002810.1	BRADI2G06030.1	MLOC_53923.1,MLOC_81291.1	Sevir.5G138200
102	OsSPL14 / WFP	Grain_yield	development	Oryza_sativa_Japonica	monocot	ENOG410YVZE	Y	AT2G42200.1,AT3G57920.1	GLYMA02G30670.2,GLYMA03G29901.1,GLYMA18G36960.1,GLYMA19G32800.1	Bra003305.1-P,Bra004674.1-P,Bra016891.1-P	Solyc10g078700.1.1	LOC_Os08g39890	BGIOSGA026705-PA	Si013870m	GRMZM2G160917,GRMZM2G460544	Sb07g027740.1	BRADI3G40030.1	MLOC_61297.1	Sevir.6G212600
103	heavy metal atpase3 (HMA3)	Metal_tolerance	abiotic_stress_response	Oryza_sativa_Japonica	monocot	COG2217	Y	AT2G19110.1,AT4G30110.1,AT4G30120.1	GLYMA09G06166.1,GLYMA13G00630.2,GLYMA17G06800.1	Bra011164.1-P,Bra011165.1-P,Bra024103.1-P,Bra024107.1-P,Bra024449.1-P,Bra038842.1-P	Solyc07g009130.2.1	LOC_Os07g12900	BGIOSGA024568-PA	Si028881m	GRMZM2G175576	Sb02g006940.1	BRADI1G53670.1	MLOC_18862.4
104	Nramp aluminum transporter1	Metal_tolerance	abiotic_stress_response	Oryza_sativa_Japonica	monocot	COG1914	Y					LOC_Os02g03900	BGIOSGA007187-PA	Si016841m	GRMZM2G168747	Sb04g002610.1			Sevir.1G097200
105	Pi-ta	Pathogen_resistance	biotic_stress_response	Oryza_sativa_Japonica	monocot	ENOG410TN00	N					LOC_Os12g18360	BGIOSGA017858-PA,BGIOSGA035675-PA	Si028710m		Sb02g021226.1,Sb08g021870.1		MLOC_74974.5,MLOC_10360.2	Sevir.2G181400
106	Pi2 (Nbs4-Pi2)	Pathogen_resistance	biotic_stress_response	Oryza_sativa_Japonica	monocot	ENOG411BMRH	Y					LOC_Os06g17920	BGIOSGA022713-PA	Si005773m		Sb10g010680.1,Sb02g001150.1	BRADI1G50407.1	MLOC_30912.2
107	Pi9 (= Nbs2-Pi9)	Pathogen_resistance	biotic_stress_response	Oryza_sativa_Japonica	monocot	ENOG411BH9E	Y	AT3G46710				LOC_Os06g05359		Si012235m			BRADI3G42037.1	MLOC_62179.1	Sevir.7G057700
108	Piz-t	Pathogen_resistance	biotic_stress_response	Oryza_sativa_Japonica	monocot	ENOG411BMRH	Y					LOC_Os06g17900	BGIOSGA022713-PA	Si005773m		Sb10g010680.1,Sb02g001150.1	BRADI1G50407.1	MLOC_30912.2
109	Pi36	Pathogen_resistance	biotic_stress_response	Oryza_sativa_Japonica	monocot	ENOG411BQPB	Y					LOC_Os08g05440.1	BGIOSGA019666-PA,BGIOSGA018466-PA,BGIOSGA024451-PA,BGIOSGA033683-PA,BGIOSGA019665-PA,BGIOSGA033692-PA	Si025902m,Si025895m	GRMZM2G065692,GRMZM2G003755	Sb09g004240.1,Sb09g004210.1	BRADI4G44227.1,BRADI4G44575.1,BRADI4G44217.1,BRADI4G44550.2,BRADI4G09587.1,BRADI4G44603.1	MLOC_69420.13,MLOC_57619.2
110	Pi37	Pathogen_resistance	biotic_stress_response	Oryza_sativa_Japonica	monocot	ENOG411BEAC	Y					LOC_Os01g57310	BGIOSGA004576-PA	Si021003m,Si020996m	GRMZM2G005134,GRMZM2G443939,GRMZM2G061742,GRMZM2G003625	Sb08g002350.1,Sb08g002390.1,Sb08g002410.1	BRADI2G51807.1	MLOC_62897.1	Sevir.3G411966
111	Pi5-1 + Pi5-2 cluster	Pathogen_resistance	biotic_stress_response	Oryza_sativa_Japonica	monocot	ENOG411BH4V	Y					LOC_Os09g15840	BGIOSGA030525-PA		GRMZM2G163860	Sb02g022180.1	BRADI4G28177.1	MLOC_91.1
112	Pib	Pathogen_resistance	biotic_stress_response	Oryza_sativa_Japonica	monocot	ENOG411BMEJ	Y					LOC_Os02g57310		Si027790m			BRADI2G39560.1	MLOC_17252.1
113	Pid3	Pathogen_resistance	biotic_stress_response	Oryza_sativa_Japonica	monocot	ENOG411BMUP	Y					LOC_Os06g22460					BRADI3G22520.1	MLOC_6570.1
114	Pikm2-TS	Pathogen_resistance	biotic_stress_response	Oryza_sativa_Japonica	monocot	ENOG411BQBX	Y					LOC_Os11g46200	BGIOSGA006886-PA	Si027992m,Si028053m,Si025975m		Sb02g005305.1,Sb02g005210.1,Sb02g005220.1,Sb02g005280.1			Sevir.8G146400, Sevir.8G252000
115	Pikm1-TS	Pathogen_resistance	biotic_stress_response	Oryza_sativa_Japonica	monocot	ENOG411BEI0	Y					LOC_Os11g46210	BGIOSGA007774-PA,BGIOSGA032326-PA	Si027806m,Si028056m,Si026071m,Si027964m	GRMZM2G397788	Sb05g026940.1,Sb05g027040.1,Sb05g026970.1	BRADI1G01250.1	MLOC_69418.1
116	Xa1	Pathogen_resistance	biotic_stress_response	Oryza_sativa_Japonica	monocot	ENOG411BGSG	Y					LOC_Os04g53160	BGIOSGA017162-PA,BGIOSGA040546-PA	Si011905m		Sb09g027520.1,Sb09g027470.1	BRADI5G22187.1	MLOC_43035.1
117	Xa21	Pathogen_resistance	biotic_stress_response	Oryza_sativa_Japonica	monocot	ENOG410YQ5T	Y	AT2G35900.1	GLYMA03G36230.1	Bra017282.1-P,Bra023040.1-P	Solyc10g081750.1.1	LOC_Os01g56470	BGIOSGA004531-PA	Si003064m	GRMZM2G016068,GRMZM2G045550	Sb03g035880.1	BRADI2G51240.1	MLOC_8179.1	Sevir.5G338000
118	Xa26	Pathogen_resistance	biotic_stress_response	Oryza_sativa_Japonica	monocot	ENOG410JRUT	Y					LOC_Os04g13640	BGIOSGA007774-PA,BGIOSGA032326-PA	Si027806m,Si028056m,Si026071m,Si027964m	GRMZM5G851140,GRMZM2G009770	Sb05g026940.1,Sb05g027040.1,Sb05g026970.1	BRADI1G01250.1	MLOC_44272.1,MLOC_65155.1
119	qPE9-1	Plant_and_inflorescence_architecture	development	Oryza_sativa_Japonica	monocot	ENOG410YVBK	Y	AT5G20635.1	GLYMA09G08131.1,GLYMA13G17071.1,GLYMA15G19631.1,GLYMA17G05640.1		Solyc07g041980.2.1	LOC_Os09g26999	BGIOSGA030843-PA	Si033308m	GRMZM2G001660,GRMZM2G172320	Sb02g025860.1	BRADI4G31417.1		Sevir.6G177400
120	PROG1	Plant_architecture	development	Oryza_sativa_Japonica	monocot	ENOG410Z8PA	Y	AT5G48890.1	GLYMA08G47140.2GLYMA18G38340.1	Bra036156.1-P,Bra037455.1-P		LOC_Os07g05900	BGIOSGA024803-PA,BGIOSGA035827-PA,BGIOSGA009693-PA	Si023301m,Si032699m,Si032168m,Si032424m,Si031273m	GRMZM2G013960,GRMZM2G059088,GRMZM5G888196,GRMZM2G089448	Sb01g005950.1,Sb02g003180.1,Sb02g003170.1,Sb08g021800.1	BRADI1G06420.1,BRADI4G01450.1,BRADI1G58540.1,BRADI1G58560.1,BRADI1G58550.1	MLOC_66112.1,MLOC_22475.1,MLOC_74862.2,MLOC_11235.1,MLOC_3846.1,MLOC_65371.1	Sevir.3G408300, Sevir.9G063300
121	OsC1	Plant_coloration_(loss_of_apiculus_color)	color_texture_flavor_and_fragrance	Oryza_sativa_Japonica	monocot	COG5147	Y	AT5G35550.1		Bra035532.1-P		LOC_Os06g10350	BGIOSGA022508-PA	Si008089m	GRMZM2G005066,GRMZM2G701063	Sb10g006700.1
122	Sd1 (=GA20ox-2)	Plant_height	development	Oryza_sativa_Japonica	monocot	COG3491	Y	AT1G44090.1	GLYMA04G38850.1,GLYMA04G42300.1,GLYMA06G12510.1,GLYMA06G16080.1,GLYMA13G09460.2,GLYMA14G25280.1	Bra014019.1-P	Solyc11g013360.1.1	LOC_Os01g66100	BGIOSGA004933-PA	Si001573m	GRMZM2G049418,GRMZM2G368411	Sb03g041900.1	BRADI2G57027.1	MLOC_56462.1	Sevir.5G410400
123	SKC1 =OsHKT1	Salt_homeostasis_and_salt_tolerance	abiotic_stress_response	Oryza_sativa_Japonica	monocot	COG0168	Y					LOC_Os06g48810	BGIOSGA020584-PA	Si008100m			BRADI1G34220.1	MLOC_13204.1	Sevir.4G254400
124	Rc	Seed_color	color_texture_flavor_and_fragrance	Oryza_sativa_Japonica	monocot	ENOG4111SJN	Y	AT4G09820.1	GLYMA02G16670.2,GLYMA03G30940.2,GLYMA10G03140.2,GLYMA19G33770.1	Bra037887.1-P	Solyc09g065100.1.1	LOC_Os07g11020	BGIOSGA025388-PA	Si029106m	GRMZM2G042733	Sb02g006390.1	BRADI1G54070.1	MLOC_6900.1	Sevir.2G085200
125	Bh4	Seed_hull_color	color_texture_flavor_and_fragrance	Oryza_sativa_Japonica	monocot	COG0814	Y					LOC_Os04g38660.1		Si001501m,Si012545m				MLOC_13790.2,MLOC_68132.2	Sevir.5G125700
126	qSH1	Seed_shattering	development	Oryza_sativa_Japonica	monocot	ENOG410XPMQ	Y	AT5G02030.1	GLYMA01G25710.2,GLYMA03G17397.1,GLYMA18G41280.1	Bra005703.1-P,Bra009618.1-P,Bra028883.1-P	Solyc09g011380.2.1,Solyc10g086640.1.1	LOC_Os01g62920	BGIOSGA000492-PA	Si000753m	GRMZM2G154641	Sb03g039840.1	BRADI2G54940.1	MLOC_66099.1	Sevir.5G386500
127	Shattering1 - OsSh1	Seed_shattering	development	Oryza_sativa_Japonica	monocot	ENOG410YHWI	Y	AT1G08465.1	GLYMA06G46560.1,GLYMA12G10210.3,GLYMA13G38750.1	Bra018624.1-P,Bra030728.1-P,Bra031629.1-P	Solyc06g073920.2.1,Solyc11g071810.1.1	LOC_Os03g44710	BGIOSGA013223-PA		GRMZM2G074124		BRADI1G13570.1	MLOC_70676.2
128	shattering4 - sh4	Seed_shattering	development	Oryza_sativa_Japonica	monocot	ENOG410YGIR	Y		GLYMA20G32540.2			LOC_Os04g57530	BGIOSGA014125-PA		GRMZM2G081445	Sb06g032410.1	BRADI5G25700.1	MLOC_73110.2
129	OsGA20ox1	Seedling_vigor	development	Oryza_sativa_Japonica	monocot	COG3491	Y	AT1G60980.1,AT4G25420.1,AT5G07200.1,AT5G51810.1	GLYMA03G02260.1,GLYMA07G08950.1,GLYMA09G27490.1,GLYMA10G38601.1,GLYMA16G32550.2,GLYMA20G29210.1	Bra005927.1-P,Bra009285.1-P,Bra010064.1-P,Bra013890.1-P,Bra019165.1-P,Bra022565.1-P,Bra027106.1-P,Bra028277.1-P,Bra028706.1-P,Bra031467.1-P,Bra039251.1-P	Solyc01g093980.2.1,Solyc03g006880.2.1,Solyc06g035530.2.1,Solyc06g050110.1.1,Solyc09g009110.2.1,Solyc09g018410.1.1,Solyc09g018420.1.1,Solyc09g042210.1.1,Solyc10g045690.1.1,Solyc10g045770.1.1,Solyc11g072310.1.1	LOC_Os03g63970	BGIOSGA013982-PA	Si036235m	AC203966.5_FGP005	Sb01g000580.1	BRADI1G00950.1	MLOC_16059.1	Sevir.9G004700
130	BCMA3	Glucosinolate_production	biotic_stress_response	Rockcress	dicot	ENOG410BW1A	N	AT1G16400,AT1G16410		Bra026058.1-P
131	ALT4	Metal_tolerance	abiotic_stress_response	Rye	monocot	ENOG411BFQE	N	AT3G11680,AT1G08440,AT2G27240	GLYMA12G09980.1,GLYMA19G38710.2,GLYMA03G36060.1,GLYMA11G18300.1	Bra034819,Bra030726,Bra018625,Bra034339,Bra038672	Solyc10G081890.1.1,Solyc11G068970.1.1	LOC_Os04g34010.1		Si015195m,Si012333m,Si012669m,Si033923m,Si035628m	GRMZM5G858653,AC233887.1_FGP005	Sb06g016260.1	BRADI5G09690.1		Sevir.6G010200, Sevir.7G102000, Sevir.9G347200
132	Flowering locus T (LpFT3)	Flowering_time	development	Ryegrass	monocot	KOG3346	N	AT2G27550.1,AT5G03840.1	GLYMA03G35250.1,GLYMA10G08340.1,GLYMA12G30940.2,GLYMA13G22030.1,GLYMA13G39360.2,GLYMA19G37890.1,GLYMA20G02845.1	Bra000506.1-P,Bra005783.1-P,Bra009508.1-P,Bra012010.1-P,Bra028815.1-P,Bra034357.1-P	Solyc09g009560.1.1	LOC_Os11g05470.1	BGIOSGA034481-PA	Si028168m	GRMZM2G092008,GRMZM2G338454	Sb08g003210.1	BRADI4G42400.1	MLOC_35818.3,MLOC_44160.1	Sevir.8G033800
133	VRN1	Flowering_time	development	Ryegrass	monocot	ENOG411BFD5	N	AT5G60910.1,AT1G69120.1,AT1G26310.1	GLYMA06G22650.2,GLYMA04G31847.1	Bra011021.1-P,Bra004361,Bra029347	Solyc03G114830.2.1	LOC_Os03g54160.1,LOC_Os07g01820.1	BGIOSGA024961-PA,BGIOSGA009798-PA	Si030802m	GRMZM2G148693,GRMZM2G032339,GRMZM2G553379,GRMZM2G072582	Sb01g007790.1,Sb02g001090.1	BRADI1G59250.1,BRADI1G08340.1	MLOC_61901.1	Sevir.9G087100
134	FLC (Flowering Locus C)	Flowering_time	development	Capsella_rubella	dicot	ENOG411BUQE	N	At5G10140	GLYMA05G28130.1,GLYMA08G11110.1	Bra028599,Bra006051.1-P,Bra009055.1-P
135	ROSEA1	Plant_coloration_(flowers)	color_texture_flavor_and_fragrance	Antirrhinum_majus	dicot	ENOG411BRS3	N	AT1G66370.1	GLYMA09G36983.1,GLYMA19G02980.2,GLYMA09G36966.1,GLYMA18G49690.1,GLYMA09G37010.2,GLYMA18G49670.2	Bra004162.1-P,Bra039763.1-P	Solyc10g086250.1.1,Solyc10g086260.1.1,Solyc10g086270.1.1,Solyc10g086290.1.1
136	PRR37	Flowering_time	development	Sorghum_bicolor	monocot	COG5641	Y								GRMZM2G005732	Sb06g014570		MLOC_24308.1
137	phytochrome B (PHYB)	Light_sensitivity	abiotic_stress_response	Sorghum_bicolor	monocot	COG4251	Y	AT2G18790.1,AT4G16250.1	GLYMA09G03990.1,GLYMA15G14980.1	Bra022192.1-P	Solyc01g059870.2.1,Solyc05g053410.2.1	LOC_Os03g19590.1		Si033968m	GRMZM2G092174	Sb01g037340.1	BRADI1G64360.1	MLOC_9834.1	Sevir.9G432200
138	MATE1/AltSB/SbMATE	Metal_tolerance	abiotic_stress_response	Sorghum_bicolor	monocot	COG0534	Y	AT3G08040.1	GLYMA09G15550.2,GLYMA12G36610.1,GLYMA12G36620.2,GLYMA13G27300.2,GLYMA15G43021.1	Bra001282.1-P,Bra001283.1-P,Bra029694.1-P,Bra040047.1-P	Solyc01g087150.2.1	LOC_Os01g69010.1	BGIOSGA005059-PA			Sb03g043890.1
139	ds1	Pathogen_resistance	biotic_stress_response	Sorghum_bicolor	monocot	ENOG410IH5R	N	AT3G47090,AT3G47570,AT3G47580,AT5G20480,AT3G47110	GLYMA09G35090.2,GLYMA07G17910.2,GLYMA18G42770.2,GLYMA01G35561.1,GLYMA14G06580.1,GLYMA09G05550.1,GLYMA03G23780.1,GLYMA07G19180.1,GLYMA09G35140.1,GLYMA01G20885.1,GLYMA14G06570.1,GLYMA13G34310.2	Bra005563,Bra018128,Bra022422,Bra007256,Bra035694,Bra036778,Bra006717,Bra015204,Bra035695,Bra037076,Bra021289,Bra002305.1-P,Bra027572,Bra018164,Bra005562,Bra006560	Solyc07G018190.2.1,Solyc10G085120.1.1,Solyc07G018180.1.1,Solyc03G019980.1.1,Solyc06G076910.1.1,Solyc04G009040.2.1	LOC_Os02g40240.1,LOC_Os11g36140.1,LOC_Os08g14990.1,LOC_Os11g36150.1,LOC_Os07g03000.1,LOC_Os11g07260.1,LOC_Os11g07180.1,LOC_Os11g07270.1,LOC_Os10g19160.1,LOC_Os11g36090.1,LOC_Os11g07060.1,LOC_Os12g42520.1,LOC_Os11g29790.1,LOC_Os01g05870.1,LOC_Os11g07225.1,LOC_Os11g07160.1,LOC_Os01g05980.1,LOC_Os01g05960.1,LOC_Os01g05640.1,LOC_Os08g14950.1,LOC_Os11g07100.1,LOC_Os09g16950.1,LOC_Os01g33950.1,LOC_Os08…	BGIOSGA035283-PA,BGIOSGA033781-PA,BGIOSGA030549-PA,BGIOSGA033780-PA,BGIOSGA034901-PA,BGIOSGA003663-PA,BGIOSGA034889-PA,BGIOSGA034899-PA,BGIOSGA028289-PA,BGIOSGA038145-PA,BGIOSGA032723-PA,BGIOSGA002807-PA,BGIOSGA002390-PA,BGIOSGA034892-PA	Si025889m,Si000144m,Si016173m,Si021054m,Si000145m,Si025872m,Si025352m,Si004924m,Si024978m,Si028784m,Si032682m,Si015772m,Si000199m,Si027658m,Si032212m,Si013152m,Si005767m,Si004977m,Si016201m,Si000143m,Si028287m,Si025888m,Si028791m,Si028003m	GRMZM2G322348,GRMZM2G123314,GRMZM2G015406,GRMZM2G178753,GRMZM2G389948,GRMZM2G026943,GRMZM2G048801,GRMZM2G456669	Sb05g005490.1	BRADI2G00540.1,BRADI1G29792.1,BRADI3G48790.1,BRADI4G03650.1,BRADI5G25117.1,BRADI4G03660.1,BRADI1G47990.1,BRADI4G24410.1,BRADI4G24457.1,BRADI3G48760.1,BRADI4G16130.1,BRADI5G15027.1,BRADI3G49640.1,BRADI4G08300.1	MLOC_55967.1,MLOC_37499.1,MLOC_56473.2,MLOC_73066.1,MLOC_81219.2,MLOC_17010.1,MLOC_16613.8,MLOC_80515.1,MLOC_10527.1,MLOC_12033.1,MLOC_20132.1	Sevir.1G188900, Sevir.3G406701, Sevir.2G435700, Sevir.6G079350, Sevir.4G145700, Sevir.1G250300, Sevir.8G129300, Sevir.2G096700, Sevir.8G167600
140	Sh1	Seed_shattering	development	Sorghum_bicolor	monocot	ENOG41103M4	N					LOC_Os10g36420.1		Si036788m	GRMZM2G167824	Sb01g017560.1	BRADI3G30410.1	MLOC_70653.1	Sevir.9G196700
141	BADH2	Fragrance	color_texture_flavor_and_fragrance	Glycine_max	dicot	COG1012	Y	AT1G74920.1	GLYMA05G01770.1,GLYMA06G19820.1,GLYMA17G10120.1	Bra003781.1-P	Solyc03g113800.2.1,Solyc06g071290.2.1	LOC_Os04g39020.1,LOC_Os08g32870.1	BGIOSGA014941-PA,BGIOSGA028697-PA	Si009902m,Si013592m	GRMZM2G013214,GRMZM2G016189,GRMZM2G135470,GRMZM2G146754,GRMZM2G350397,GRMZM2G365483	Sb06g019200.1,Sb06g019210.1,Sb07g020650.1	BRADI3G36150.1,BRADI5G12617.1	MLOC_1705.1,MLOC_66224.1	Sevir.7G135300, Sevir.6G157300
142	TFL1/GmTFL1	Growth_determination_habit	development	Glycine_max	dicot	KOG3346	N	AT2G27550.1,AT5G03840.1	GLYMA03G35250.1,GLYMA10G08340.1,GLYMA12G30940.2,GLYMA13G22030.1,GLYMA13G39360.2,GLYMA19G37890.1,GLYMA20G02845.1	Bra000506.1-P,Bra005783.1-P,Bra009508.1-P,Bra012010.1-P,Bra028815.1-P,Bra034357.1-P	Solyc09g009560.1.1	LOC_Os11g05470.1	BGIOSGA034481-PA	Si028168m	GRMZM2G092008,GRMZM2G338454	Sb08g003210.1	BRADI4G42400.1	MLOC_35818.3,MLOC_44160.1	Sevir.8G033800
143	SHMT / Rgh4	Parasite_resistance_(cyst_nematode)	biotic_stress_response	Glycine_max	dicot	COG0112	Y	AT4G13890.1,AT4G13930.1	GLYMA08G11490	Bra014001.1-P,Bra022129.1-P,Bra032749.1-P	Solyc05g053810.2.1,Solyc12g098490.1.1	LOC_Os11g26860.1,LOC_Os12g22030.1	BGIOSGA022876-PA,BGIOSGA035211-PA,BGIOSGA036327-PA	Si001011m,Si021684m,Si026132m	GRMZM2G039238,GRMZM2G078143,GRMZM2G303113,GRMZM2G427836,GRMZM2G437487	Sb05g014880.1,Sb08g019520.1	BRADI4G08097.1,BRADI4G19470.1	MLOC_25218.1,MLOC_80158.1	Sevir.5G024600, Sevir.3G305600, Sevir.8G121500
144	Rhg1	Pathogen_resistance_(cyst_nematode)	biotic_stress_response	Glycine_max	dicot	ENOG410IHIJ	N	AT3G51740.1,AT3G56100.1	GLYMA18G02681	Bra014708.1-P,Bra027751.1-P,Bra038911.1-P,Bra003227.1-P	Solyc09G015170.2.1	LOC_Os12g01700.1,LOC_Os11g01620.1,LOC_Os03g18630.1	BGIOSGA036861-PA,BGIOSGA034651-PA,BGIOSGA012425-PA	Si009399m,Si027926m,Si034267m	GRMZM2G066274,GRMZM2G089819	Sb05g000670.1,Sb08g000710.1,Sb01g038140.1	BRADI1G65110.1,BRADI4G44797.1	MLOC_71159.1,MLOC_70904.2	Sevir.9G448200, Sevir.8G016600, Sevir.9G440900
145	flavonoid 3-hydroxylase (F3'H)	Plant_coloration_(flowers)	color_texture_flavor_and_fragrance	Glycine_max	dicot	COG3491	Y	AT3G51240.1	GLYMA02G05450	Bra012862.1-P,Bra036828.1-P	Solyc02g083860.2.1	LOC_Os04g56700.1	BGIOSGA014166-PA	Si022356m	GRMZM2G062396	Sb06g031790.1	BRADI5G25050.1	MLOC_64248.1	Sevir.3G027600
146	R/Glyma09g36990	Plant_coloration_(seeds)	color_texture_flavor_and_fragrance	Glycine_max	dicot	ENOG411BRS3	N	AT1G66370.1	GLYMA09G36990.1	Bra004162.1-P,Bra039763.1-P	Solyc10g086250.1.1,Solyc10g086260.1.1,Solyc10g086270.1.1,Solyc10g086290.1.1
147	FaO-methyl-transferase (FaOMT)	Fruit_flavor	color_texture_flavor_and_fragrance	strawberry	dicot	KOG3178	N	AT1G21130,AT5G44450,AT1G51990,AT4G35150,AT1G21120,AT1G21110,AT5G37170,AT1G76790,AT1G77530,AT5G53810,AT1G77520,AT3G53140,AT5G54160,AT1G62900,AT1G63140,AT1G21130,AT4G35160,AT1G33030	GLYMA08G27260.1,GLYMA10G32010.1,GLYMA20G00590.1,GLYMA06G45043.1,GLYMA06G14210.1,GLYMA10G32020.1,GLYMA18G50290.1,GLYMA08G27090.1,GLYMA0335S00200.1,GLYMA14G38080.2,GLYMA07G05460.2,GLYMA09G12480.1,GLYMA20G31700.1,GLYMA06G14200.1,GLYMA17G16795.1,GLYMA14G38111.1,GLYMA20G35640.1,GLYMA06G43940.1,GLYMA10G32030.1,GLYMA14G00801.1,GLYMA12G13980.1,GLYMA20G35610.1,GLYMA14G38090.1,GLYMA18G50260.1,GLYMA06G14220…	Bra003007,Bra033744,Bra007770,Bra029041,Bra035481,Bra019031,Bra025874,Bra008313,Bra015664,Bra025875,Bra017700,Bra017699,Bra016432,Bra012270,Bra027815,Bra010226,Bra012269,Bra003681,Bra040689,Bra003707,Bra026320,Bra003680,Bra006970,Bra012268,Bra027556,Bra035482,Bra008316,Bra038396,Bra025876,Bra016433,Bra015719,Bra022700,Bra003009,Bra034677,Bra003682,Bra034678,Bra033498,Bra033733,Bra011292	Solyc03g097700.2.1,Solyc12g041960.1.1,Solyc02g077520.2.1,Solyc03g080180.2.1,Solyc10g085840.1.1,Solyc01g111900.2.1,Solyc02g021690.2.1,Solyc10g085830.1.1,Solyc06g060200.1.1,Solyc06g007960.2.1,Solyc02g077530.1.1,Solyc12g041950.1.1,Solyc02g077510.2.1,Solyc06g083450.2.1,Solyc02g021700.2.1,Solyc10g079540.1.1,Solyc10g008120.2.1,Solyc06g064510.2.1,Solyc12g009110.1.1,Solyc01g068550.2.1,Solyc10g005060.2.1,…	LOC_Os01g54969.1,LOC_Os08g19420.1,LOC_Os12g10170.1,LOC_Os11g20160.1,LOC_Os07g27880.1,LOC_Os12g25820.1,LOC_Os11g20090.1,LOC_Os05g43930.1,LOC_Os04g01470.1,LOC_Os07g27970.1,LOC_Os04g09604.1,LOC_Os12g13800.1,LOC_Os11g20040.1,LOC_Os10g02840.1,LOC_Os12g10140.1,LOC_Os08g06100.1,LOC_Os12g25450.1,LOC_Os03g56830.1,LOC_Os11g20080.1,LOC_Os11g19790.1,LOC_Os11g33300.1,LOC_Os11g19840.1,LOC_Os08g07260.1,LOC_Os04…	BGIOSGA036256-PA,BGIOSGA036321-PA,BGIOSGA026883-PA,BGIOSGA025650-PA,BGIOSGA029815-PA,BGIOSGA032370-PA,BGIOSGA017727-PA,BGIOSGA015497-PA,BGIOSGA034244-PA,BGIOSGA027629-PA,BGIOSGA029945-PA,BGIOSGA024348-PA,BGIOSGA021451-PA,BGIOSGA024347-PA,BGIOSGA015988-PA,BGIOSGA035174-PA,BGIOSGA034103-PA,BGIOSGA036250-PA,BGIOSGA028390-PA,BGIOSGA028393-PA,BGIOSGA038010-PA,BGIOSGA015753-PA,BGIOSGA034101-PA,BGIOSGA0…	Si026528m,Si026538m,Si020906m,Si027972m,Si026529m,Si026576m,Si036181m,Si026548m,Si026569m,Si013977m,Si022455m,Si027844m,Si001865m,Si026523m,Si033336m,Si010429m,Si013966m,Si026639m,Si014900m,Si013957m,Si019162m,Si027971m,Si036239m,Si017577m,Si010415m,Si002181m,Si004902m,Si031882m,Si022421m,Si022355m,Si036467m,Si022422m,Si039431m,Si026526m,Si026536m	GRMZM2G311036,GRMZM2G059465,GRMZM2G141026,AC196475.3_FGP004,GRMZM2G093092,AC209819.3_FGP005,GRMZM2G177424,GRMZM2G423331,GRMZM2G127418,GRMZM2G349791,GRMZM2G106172,GRMZM2G124799,GRMZM2G336824,GRMZM2G023152,GRMZM2G147491,GRMZM2G140996,GRMZM2G408458,GRMZM2G102863,GRMZM2G091774,GRMZM2G017557,GRMZM2G082007,GRMZM2G041866,GRMZM2G097297,GRMZM2G100754,GRMZM2G104710,GRMZM2G104730,GRMZM2G085924,GRMZM2G101735…	Sb09g025510.1,Sb03g034845.1,Sb05g010100.1,Sb04g036890.1,Sb10g027650.1,Sb07g004660.1,Sb05g026730.1,Sb01g033880.1,Sb10g027640.1,Sb01g042900.1,Sb05g008830.1,Sb10g027360.1,Sb01g015803.1,Sb0010S009900.1,Sb08g001245.1,Sb09g003740.1,Sb05g019040.1,Sb07g005970.1,Sb08g005125.1,Sb09g025570.1,Sb05g003780.1,Sb04g037820.1,Sb02g006640.1,Sb05g027340.1,Sb05g026710.1,Sb07g011460.1,Sb04g036900.1,Sb05g007043.1,Sb07g…	BRADI4G28057.1,BRADI1G14870.1,BRADI2G19840.1,BRADI4G18065.1,BRADI1G06780.1,BRADI3G37551.1,BRADI4G20117.1,BRADI4G20127.1,BRADI1G47030.1,BRADI2G19830.1,BRADI1G22757.1,BRADI3G16530.1,BRADI3G55890.1,BRADI2G02380.1,BRADI2G19857.1,BRADI5G23720.1,BRADI1G47017.1,BRADI2G19850.1,BRADI2G02390.1,BRADI4G20020.1,BRADI3G20597.1	MLOC_53759.1,MLOC_56220.1,MLOC_69432.2,MLOC_51326.1,MLOC_34629.1,MLOC_66877.2,MLOC_66090.1,MLOC_14101.2,MLOC_63575.2,MLOC_78823.1,MLOC_12464.2,MLOC_54134.2,MLOC_76018.2,MLOC_69043.1,MLOC_65378.1,MLOC_75528.1,MLOC_17926.1,MLOC_51427.2,MLOC_57100.1,MLOC_68921.1,MLOC_39692.1,MLOC_37601.1,MLOC_76007.1,MLOC_19305.1,MLOC_38478.1,MLOC_31360.1,MLOC_20301.1,MLOC_39951.1,MLOC_55770.2,MLOC_73233.1,MLOC_7725…	Sevir.8G108550, Sevir.8G149300, Sevir.8G094800, Sevir.9G379700, Sevir.8G112400, Sevir.8G114100, Sevir.6G087200, Sevir.5G324600, Sevir.5G335000, Sevir.8G212500, Sevir.2G087000, Sevir.7G006100, Sevir.6G154100, Sevir.6G053300, Sevir.6G181100, Sevir.8G152300, Sevir.1G044900, Sevir.7G079800, Sevir.5G324600, Sevir.5G125800, Sevir.3G251600, Sevir.9G067500, Sevir.9G267900, Sevir.8G220700
148	Hs1 = pro-1	Parasite_resistance_(nematodes)	biotic_stress_response	beet	dicot	ENOG410IFFH	N	AT3G55840.1,AT2G40000.1	GLYMA11G35050.1,GLYMA18G03310.1	Bra004994.1-P,Bra007195.1-P,Bra017040.1-P,Bra000158.1-P		LOC_Os01g63690.1	BGIOSGA000466-PA	Si001312m	GRMZM2G003682,PCO075967	Sb03g040300.1	BRADI2G55310.1	MLOC_8529.1	Sevir.5G392200
149	Flowering locus T (FT1)	Flowering_time	development	Sunflower	dicot	KOG3346	N	AT5G03840.1,AT5G62040.1,AT1G18100.1,AT4G20370.1,AT1G65480.1,AT2G27550.1	GLYMA08G47823.1,GLYMA16G32080.3,GLYMA18G53680.1,GLYMA05G34030.1,GLYMA02G07650.1,GLYMA08G47816.1,GLYMA19G28390.1,GLYMA16G26660.1,GLYMA16G26690.1,GLYMA19G37890.1	Bra009508.1-P,Bra025930.1-P,Bra012010.1-P,Bra034357.1-P,Bra031016.1-P,Bra005783.1-P,Bra028815.1-P,Bra004117.1-P,Bra022475.1-P,Bra000506.1-P,Bra015710.1-P,Bra010052.1-P	Solyc05g055660.1.1,Solyc11g008660.1.1,Solyc01g009580.1.1,Solyc03g063100.1.1,Solyc05g053850.2.1,Solyc01g009560.1.1,Solyc11g008640.1.1,Solyc02g079290.2.1,Solyc06g074350.2.1,Solyc09g009560.1.1,Solyc11g008650.1.1,Solyc03g119100.1.1,Solyc03g026050.2.1	LOC_Os04g33570.1,LOC_Os01g02120.1,LOC_Os06g06320.1,LOC_Os04g41130.1,LOC_Os11g18870.1,LOC_Os12g05590.1,LOC_Os12g13030.1,LOC_Os02g32950.1,LOC_Os02g39064.1,LOC_Os06g06300.1,LOC_Os11g05470.1,LOC_Os09g33850.1,LOC_Os02g13830.1,LOC_Os01g11940.1,LOC_Os01g10590.1,LOC_Os06g30370.1,LOC_Os01g54490.1,LOC_Os06g35940.1,LOC_Os05g44180.1	BGIOSGA034481-PA,BGIOSGA036625-PA,BGIOSGA015135-PA,BGIOSGA004454-PA,BGIOSGA017719-PA,BGIOSGA035142-PA,BGIOSGA014833-PA,BGIOSGA003015-PA,BGIOSGA007839-PA,BGIOSGA002959-PA,BGIOSGA021197-PA,BGIOSGA007632-PA,BGIOSGA035141-PA,BGIOSGA022349-PA,BGIOSGA006319-PA,BGIOSGA021057-PA,BGIOSGA006097-PA,BGIOSGA022351-PA,BGIOSGA036381-PA	Si007376m,Si004536m,Si020105m,Si008576m,Si011866m,Si004700m,Si028168m,Si012372m,Si012777m,Si003984m,Si005012m,Si007366m,Si008517m,Si027589m,Si025116m,Si011706m,Si008120m,Si020516m,Si020173m,	GRMZM2G021614,GRMZM2G179264,GRMZM2G338454,GRMZM2G080706,GRMZM2G075215,GRMZM2G141756,GRMZM2G156079,GRMZM2G075081,AC217051.3_FGP006,GRMZM2G103666,GRMZM2G127121,GRMZM2G019993,GRMZM2G021560,GRMZM2G373928,GRMZM2G059358,GRMZM2G400167,GRMZM2G062052,GRMZM2G051338,GRMZM2G108016,AC214791.2_FGP002,GRMZM2G158809,GRMZM2G132880,GRMZM2G440005,GRMZM2G092008,GRMZM2G117057,GRMZM2G152689,GRMZM2G056186	Sb02g029725.1,Sb06g020850.1,Sb10g003940.1,Sb06g012260.1,Sb03g002500.1,Sb03g001700.1,Sb05g003200.1,Sb08g008180.1,Sb03g034580.1,Sb03g008270.1,Sb04g021650.1,Sb10g021790.1,Sb04g025210.1,Sb09g025760.1,Sb08g003210.1,Sb04g008320.1,Sb06g015490.1,Sb0010s003120.1,Sb10g013070.1	BRADI4G39730.1,BRADI3G44860.1,BRADI4G39760.1,BRADI2G19670.1,BRADI4G35040.1,BRADI2G01020.1,BRADI1G38150.1,BRADI3G08890.1,BRADI4G39750.1,BRADI2G07070.1,BRADI4G42400.1,BRADI1G48830.1,BRADI3G48036.1,BRADI2G27860.1,BRADI5G14010.1,BRADI5G09270.1,BRADI1G42510.1,BRADI2G49795.1,	MLOC_57326.1,MLOC_71606.2,MLOC_74854.1,MLOC_58552.3,MLOC_44160.1,MLOC_13102.1,MLOC_68576.1,MLOC_64619.2,MLOC_35818.3	Sevir.4G148400, Sevir.1G227200, Sevir.4G169200, Sevir.7G075500, Sevir.5G074101, Sevir.8G033800, Sevir.7G154500, Sevir.8G033800, Sevir.5G141700, Sevir.5G320600, Sevir.4G195400, Sevir.4G065600, Sevir.8G109700, Sevir.3G093300, Sevir.8G033800, Sevir.4G102300, Sevir.8G033800, Sevir.5G141700
150	Pl6	Pathogen_resistance	biotic_stress_response	Sunflower	dicot	ENOG410J6H3	N	AT2G14080,AT4G12010,AT4G16940,AT5G46510,AT5G51630,AT5G44510.1,AT4G16900,AT4G16960,AT5G46520,AT5G17680	GLYMA16G03780.1,GLYMA06G46665.1,GLYMA20G02472.1,GLYMA20G10833.1,GLYMA15G02870.1,GLYMA02G43630.2,GLYMA13G03770.1,GLYMA14G05321.1,GLYMA01G03964.1,GLYMA01G03980.2,GLYMA01G03921.1,GLYMA11G21361.1,GLYMA01G04000.1	Bra036799,Bra022039,Bra012541,Bra023632.1-P,Bra013959,Bra029431,Bra022034,Bra022037,Bra012689	Solyc04G007320.1.1,Solyc07G055380.1.1,Solyc04G056570.2.1,Solyc02G082050.2.1
151	CYC-like HaCYC2c	Plant_morphology_(flowers)	development	Sunflower	dicot	ENOG410J0IG	N	AT3G18550.1,AT1G68800.1	GLYMA04G22407.1,GLYMA06G23410.2	Bra001710,Bra037579,Bra038350	Solyc04g006980.1.1,Solyc06g069240.1.1,Solyc05g009900.1.1,Solyc03g119770.2.1	LOC_Os09g24480.1,LOC_Os03g49880.1	BGIOSGA013417-PA,BGIOSGA030744-PA	Si038692m,Si033183m	GRMZM2G110242,AC233950.1_FGP002,GRMZM2G064628,AC190734.2_FGP003	Sb01g010690.1,Sb02g024450.1	BRADI4G29980.1,BRADI1G11060.1	MLOC_70116.1,MLOC_4614.1	Sevir.9G122200, Sevir.6G163100
152	Cycloidea (Lcyc)	Plant_morphology_(flowers)	development	Linaria_vulgaris	dicot	ENOG410J0IG	N	AT3G18550.1,AT1G68800.1	GLYMA04G22407.1,GLYMA06G23410.2	Bra001710.1-P,Bra037579.1-P,Bra038350.1-P	Solyc04g006980.1.1,Solyc06g069240.1.1,Solyc05g009900.1.1,Solyc03g119770.2.1	LOC_Os09g24480.1,LOC_Os03g49880.1	BGIOSGA013417-PA,BGIOSGA030744-PA	Si038692m,Si033183m	GRMZM2G110242,GRMZM2G064628	Sb01g010690.1,Sb02g024450.1	BRADI4G29980.1,BRADI1G11060.1	MLOC_70116.1,MLOC_4614.1	Sevir.9G122200, Sevir.6G163100
153	ripening inhibitor (rin)	Fruit_ripening	development	Solanum_lycopersicum	dicot	COG5068	Y	AT2G03710.1		Bra017376.1-P,Bra025126.1-P,Bra026543.1-P	Solyc05g012020.2.1
154	LeSPL-CNR	Fruit_ripening	development	Solanum_lycopersicum	dicot	ENOG410ZM8F	Y	AT2G33810.1	GLYMA07G31880.1,GLYMA13G24590.2,GLYMA13G31090.1,GLYMA15G08270.1	Bra005470.1-P,Bra021880.1-P	Solyc02g077920.2.1
155	SUN	Fruit_shape	development	Solanum_lycopersicum	dicot	ENOG41119TP	Y	AT5G03960.1	GLYMA10G16100.2	Bra009498.1-P,Bra028807.1-P	Solyc10g079240.1.1
156	OVATE	Fruit_shape	development	Solanum_lycopersicum	dicot	ENOG410IYG1	Y	AT2G18500.1	GLYMA04G03531.1,GLYMA06G03600.2,GLYMA07G34120.2	Bra039604.1-P	Solyc02g085500.2.1	LOC_Os03g10150.1	BGIOSGA011277-PA		GRMZM2G121706	Sb01g043950.1	BRADI1G71320.1	MLOC_58853.1
157	FW2.2	Fruit_size	development	Solanum_lycopersicum	dicot	ENOG410YK39	Y		GRMZM2G015941		Solyc02g090730.2.1	LOC_Os02g52550.1	BGIOSGA009098-PA	Si018451m	GRMZM2G015941	Sb04g034060.1	BRADI3G58080.1	MLOC_4232.1	Sevir.1G336800
158	fasciated	Fruit_size_and_architecture	development	Solanum_lycopersicum	dicot	ENOG410YHWI	Y	AT1G08465.1	GLYMA06G46560.1,GLYMA12G10210.3,GLYMA13G38750.1	Bra018624.1-P,Bra030728.1-P,Bra031629.1-P	Solyc11g071810.1.1	LOC_Os03g44710.1,LOC_Os12g42610.1	BGIOSGA037817-PA,BGIOSGA013223-PA	Si023308m	GRMZM2G074124,GRMZM2G116646,GRMZM2G141955	Sb08g022030.1	BRADI1G13570.1,BRADI4G01300.1	MLOC_66260.1,MLOC_70676.2	Sevir.9G153200
159	Brix9-2-5/LIN5 invertase	Fruit_sugar_content	color_texture_flavor_and_fragrance	Solanum_lycopersicum	dicot	COG1621	Y	AT2G36190.1,AT3G52600.1	GLYMA01G15883.1,GLYMA03G35520.1,GLYMA10G08670.2,GLYMA19G38160.1,GLYMA20G03553.1,GLYMA20G03580.2,GLYMA20G03620.2,GLYMA20G03640.2	Bra017257.1-P,Bra023053.1-P,Bra033419.1-P	Solyc09g010080.2.1	LOC_Os02g33110.1_,LOC_Os03g52560.1_,LOC_Os04g33720.1_,LOC_Os04g33740.1	BGIOSGA008363-PA,BGIOSGA016363-PA,BGIOSGA016364-PA	Si009687m,Si009691m,Si009702m,Si012687m,Si016754m,Si039535m	GRMZM2G095725,GRMZM2G119689,GRMZM2G123633,GRMZM2G139300	Sb0067s002010.1,Sb0067s002110.1,Sb0067s002130.1,Sb0067s002240.1,Sb01g008910.1,Sb04g021810.1	BRADI1G09500.1,BRADI3G44990.1,BRADI5G09420.1,BRADI5G09430.1	MLOC_5612.4,MLOC_56998.3,MLOC_64782.2	Sevir.7G099300, Sevir.7G099300, Sevir.9G100600
160	Mi1.2	Parasite_resistance	biotic_stress_response	Solanum_lycopersicum	dicot	ENOG411BC0V	N				Solyc11g069020.1.1	LOC_Os01g70080.1	BGIOSGA000221-PA	Si000219m	GRMZM2G016802	Sb03g044400.1	BRADI2G59310.1	MLOC_79654.2	Sevir.5G441000
161	Cf-2.1	Pathogen_resistance	biotic_stress_response	Solanum_lycopersicum	dicot	ENOG411BFU2	Y	AT2G15080.1	GLYMA16G28460.2,GLYMA01G31711.1,GLYMA03G07240.1,GLYMA16G28500.2,GLYMA16G28510.2,GLYMA14G34880.1,GLYMA18G43520.2,GLYMA18G43510.2	Bra020706.1-P,Bra021803.1-P,Bra021802.1-P,Bra001992.1-P	Solyc01g005760.2.1,Solyc09g005080.1.1,Solyc09g005090.1.1	LOC_Os01g06900.1,LOC_Os04g40440.1,LOC_Os01g06790.1	BGIOSGA002836-PA	Si028781m,Si011896m,Si015689m,Si015723m,Si015806m,Si028774m,Si033352m,Si029470m	GRMZM2G123963,GRMZM2G174128	Sb03g005070.1,Sb04g008460.1,Sb03g037930.1	BRADI2G03920.1,BRADI5G14330.1,BRADI2G61460.1	MLOC_13945.5	Sevir.7G149600, Sevir.2G056901
162	Cf-2.2	Pathogen_resistance	biotic_stress_response	Solanum_lycopersicum	dicot	ENOG411BFU2	N	AT2G15080.2	GLYMA16G28460.2,GLYMA01G31711.1,GLYMA03G07240.1,GLYMA16G28500.2,GLYMA16G28510.2,GLYMA14G34880.1,GLYMA18G43520.2,GLYMA18G43510.3	Bra020706.1-P,Bra021803.1-P,Bra021802.1-P,Bra001992.1-P	Solyc01g005760.2.1,Solyc09g005080.1.1,Solyc09g005090.1.2	LOC_Os01g06900.1,LOC_Os04g40440.1,LOC_Os01g06790.2	BGIOSGA002836-PA	Si028781m,Si011896m,Si015689m,Si015723m,Si015806m,Si028774m,Si033352m,Si029470m	GRMZM2G123963,GRMZM2G174128	Sb03g005070.1,Sb04g008460.1,Sb03g037930.2	BRADI2G03920.1,BRADI5G14330.1,BRADI2G61460.2	MLOC_13945.6	Sevir.7G149600, Sevir.2G056901
163	Cf-4/9	Pathogen_resistance	biotic_stress_response	Solanum_lycopersicum	dicot	ENOG411C0Z6	N		GLYMA14G34901.1,GLYMA14G34930.2,GLYMA14G34975.1		Solyc01g009700.1.1,Solyc01g005780.1.1,Solyc01g005720.2.1	LOC_Os01g06890.1,LOC_Os01g06760.1
164	MLO1	Pathogen_resistance	biotic_stress_response	Solanum_lycopersicum	dicot	ENOG410IJ5H	N		GLYMA13G30760.2,GLYMA03G33660.2		Solyc04g049090.2.1
165	Pto	Pathogen_resistance	biotic_stress_response	Solanum_lycopersicum	dicot	ENOG411BIC3	N	AT3G46290.1	GLYMA12G07960.1,GLYMA15G04790.1	Bra018214.1-P	Solyc05g013320.1.1	LOC_Os06g22810.1	BGIOSGA022831-PA	Si021217m	GRMZM2G432722	Sb10g025840.1	BRADI2G62060.1,BRADI1G59210.1	MLOC_78303.1	Sevir.3G042700
166	Style2.1	Style_length,_autogamy	development	Solanum_lycopersicum	dicot	ENOG4111CDZ	Y				Solyc02g087860.2.1	LOC_Os10g26410.1	BGIOSGA031957-PA	Si038282m	AC149829.2_FGP004,GRMZM2G159456	Sb01g045690.1	BRADI1G73140.1
167	self-pruning (sp)	Vegetative/Reproductive_state_switch	development	Solanum_lycopersicum	dicot	COG1881	Y	AT2G27550.1	GLYMA12G30940.2,GLYMA13G39360.2	Bra000506.1-P,Bra012010.1-P,Bra034357.1-P	Solyc06g074350.2.1
168	RCR3	Pathogen_resistance	biotic_stress_response	Solanum_lycopersicum	dicot	COG4870	Y	AT1G29080.1,AT1G29090.1,AT1G29110.1,AT2G27420.1,AT2G34080.1,AT3G49340.1		Bra005454.1-P,Bra011453.1-P,Bra012021.1-P,Bra014196.1-P,Bra014197.1-P,Bra017990.1-P,Bra019592.1-P,Bra021893.1-P,Bra029946.1-P,Bra030118.1-P,Bra035999.1-P,Bra040772.1-P	Solyc02g076980.2.1	LOC_Os01g42780.1,LOC_Os01g42790.1,LOC_Os06g38450.1,LOC_Os07g01800.1	BGIOSGA001215-PA,BGIOSGA001216-PA,BGIOSGA025018-PA,BGIOSGA040716-PA	Si022523m,Si024142m,Si026581m,Si026599m,Si027274m,Si027295m,Si027399m,Si027414m,Si027514m,Si028315m	GRMZM2G070011,GRMZM2G098102,GRMZM2G166870	Sb05g005530.1,Sb05g013840.1	BRADI1G37297.1,BRADI2G43410.1,BRADI2G43420.1,BRADI2G43430.1,BRADI5G11830.1	MLOC_10981.1	Sevir.3G288300, Sevir.8G063200
169	protoporphyrinogen oxidase (PPO2 = PPX2L)	Xenobiotic_resistance_(herbicides)	biotic_stress_response	Amaranthus_tuberculatus	dicot	KOG1276	N	AT5G14220.1,AT4G01690.1	GLYMA08G47140.2,GLYMA18G38340.1	Bra033317.1-P,Bra008772.1-P	Solyc03g005080.2.1,Solyc01g079090.2.1	LOC_Os01g18320.1,LOC_Os04g41260.1	BGIOSGA003290-PA,BGIOSGA023204-PA,BGIOSGA016653-PA	Si009767m,Si000973m	GRMZM2G364901,GRMZM2G039396,GRMZM2G441444,GRMZM2G141992	Sb06g020950.1,Sb03g011670.1	BRADI5G14120.1,BRADI2G11107.1	MLOC_73647.4,MLOC_81101.1	Sevir.7G155600, Sevir.5G032500
170	CBF12	Cold_resistance	abiotic_stress_response	Wheat	monocot	ENOG410JVG0	Y					LOC_Os09g35030.1	BGIOSGA029415-PA	Si031001m,Si030998m	GRMZM2G069126	Sb02g030320.1	BRADI4G35650.1
171	Flowering locus T (=TaFT=VRN3)	Flowering_time	development	Wheat	monocot	KOG3346	N	AT5G03840.1,AT5G62040.1,AT1G18100.1,AT4G20370.1,AT1G65480.1,AT2G27550.1	GLYMA08G47823.1,GLYMA16G32080.3,GLYMA18G53680.1,GLYMA05G34030.1,GLYMA02G07650.1,GLYMA08G47816.1,GLYMA19G28390.1,GLYMA16G26660.1,GLYMA16G26690.1,GLYMA19G37890.1	Bra009508.1-P,Bra025930.1-P,Bra012010.1-P,Bra034357.1-P,Bra031016.1-P,Bra005783.1-P,Bra028815.1-P,Bra004117.1-P,Bra022475.1-P,Bra000506.1-P,Bra015710.1-P,Bra010052.1-P	Solyc05g055660.1.1,Solyc11g008660.1.1,Solyc01g009580.1.1,Solyc03g063100.1.1,Solyc05g053850.2.1,Solyc01g009560.1.1,Solyc11g008640.1.1,Solyc02g079290.2.1,Solyc06g074350.2.1,Solyc09g009560.1.1,Solyc11g008650.1.1,Solyc03g119100.1.1,Solyc03g026050.2.1	LOC_Os04g33570.1,LOC_Os01g02120.1,LOC_Os06g06320.1,LOC_Os04g41130.1,LOC_Os11g18870.1,LOC_Os12g05590.1,LOC_Os12g13030.1,LOC_Os02g32950.1,LOC_Os02g39064.1,LOC_Os06g06300.1,LOC_Os11g05470.1,LOC_Os09g33850.1,LOC_Os02g13830.1,LOC_Os01g11940.1,LOC_Os01g10590.1,LOC_Os06g30370.1,LOC_Os01g54490.1,LOC_Os06g35940.1,LOC_Os05g44180.1	BGIOSGA034481-PA,BGIOSGA036625-PA,BGIOSGA015135-PA,BGIOSGA004454-PA,BGIOSGA017719-PA,BGIOSGA035142-PA,BGIOSGA014833-PA,BGIOSGA003015-PA,BGIOSGA007839-PA,BGIOSGA002959-PA,BGIOSGA021197-PA,BGIOSGA007632-PA,BGIOSGA035141-PA,BGIOSGA022349-PA,BGIOSGA006319-PA,BGIOSGA021057-PA,BGIOSGA006097-PA,BGIOSGA022351-PA,BGIOSGA036381-PA	Si007376m,Si004536m,Si020105m,Si008576m,Si011866m,Si004700m,Si028168m,Si012372m,Si012777m,Si003984m,Si005012m,Si007366m,Si008517m,Si027589m,Si025116m,Si011706m,Si008120m,Si020516m,Si020173m,	GRMZM2G021614,GRMZM2G179264,GRMZM2G338454,GRMZM2G080706,GRMZM2G075215,GRMZM2G141756,GRMZM2G156079,GRMZM2G075081,AC217051.3_FGP006,GRMZM2G103666,GRMZM2G127121,GRMZM2G019993,GRMZM2G021560,GRMZM2G373928,GRMZM2G059358,GRMZM2G400167,GRMZM2G062052,GRMZM2G051338,GRMZM2G108016,AC214791.2_FGP002,GRMZM2G158809,GRMZM2G132880,GRMZM2G440005,GRMZM2G092008,GRMZM2G117057,GRMZM2G152689,GRMZM2G056186	Sb02g029725.1,Sb06g020850.1,Sb10g003940.1,Sb06g012260.1,Sb03g002500.1,Sb03g001700.1,Sb05g003200.1,Sb08g008180.1,Sb03g034580.1,Sb03g008270.1,Sb04g021650.1,Sb10g021790.1,Sb04g025210.1,Sb09g025760.1,Sb08g003210.1,Sb04g008320.1,Sb06g015490.1,Sb0010s003120.1,Sb10g013070.1,	BRADI4G39730.1,BRADI3G44860.1,BRADI4G39760.1,BRADI2G19670.1,BRADI4G35040.1,BRADI2G01020.1,BRADI1G38150.1,BRADI3G08890.1,BRADI4G39750.1,BRADI2G07070.1,BRADI4G42400.1,BRADI1G48830.1,BRADI3G48036.1,BRADI2G27860.1,BRADI5G14010.1,BRADI5G09270.1,BRADI1G42510.1,BRADI2G49795.1,	MLOC_57326.1,MLOC_71606.2,MLOC_74854.1,MLOC_58552.3,MLOC_44160.1,MLOC_13102.1,MLOC_68576.1,MLOC_64619.2,MLOC_35818.3	Sevir.4G148400, Sevir.1G227200, Sevir.4G169200, Sevir.7G075500, Sevir.5G074101, Sevir.8G033800, Sevir.7G154500, Sevir.8G033800, Sevir.5G141700, Sevir.5G320600, Sevir.4G195400, Sevir.4G065600, Sevir.8G109700, Sevir.3G093300, Sevir.8G033800, Sevir.4G102300, Sevir.8G033800, Sevir.5G141700
172	VRN1	Flowering_time	development	Wheat	monocot	ENOG411BFD5	N	AT5G60910.1,AT1G69120.1,AT1G26310.1	GLYMA06G22650.2,GLYMA04G31847.1	Bra011021.1-P,Bra004361.1-P,Bra029347.1-P	Solyc03G114830.2.1	LOC_Os03g54160.1,LOC_Os07g01820.1,	BGIOSGA024961-PA,BGIOSGA009798-PA	Si030802m	GRMZM2G148693,GRMZM2G032339,GRMZM2G553379,GRMZM2G072582	Sb01g007790.1,Sb02g001090.1	BRADI1G59250.1,BRADI1G08340.1	MLOC_61901.1	Sevir.9G087100
173	VRN2	Flowering_time	development	Wheat	monocot	ENOG410JWD2	N					LOC_Os10g41100.1	BGIOSGA031408-PA	Si036910m	GRMZM2G004483	Sb01g029080.1	BRADI3G33340.1	MLOC_75450.2	Sevir.9G329600
174	NAM-B1 (=Gpc-B1)	Grain_content_and_senescence	development	Wheat	monocot	ENOG410IJAN	N	AT1G61110.1,AT3G15510.1	GLYMA12G34990.1,GLYMA12G22880.1,GLYMA07G31220.1,GLYMA13G31660.2,GLYMA06G38410.1,GLYMA15G07620.1,GLYMA13G35560.1	Bra027101.1-P,Bra027237.1-P,Bra026353.1-P,Bra001597.1-P,Bra021114.1-P	Solyc07g063420.2.1	LOC_Os07g37920.1	BGIOSGA024071-PA	Si032676m	GRMZM2G179885	Sb02g036620.1	BRADI1G24390.1	MLOC_8116.1	Sevir.2G366900
175	GW2	Grain_size	development	Wheat	monocot	KOG2789	N	AT1G78420.1	GLYMA13G33260.1,GLYMA15G39830.2	Bra025999.1-P,Bra008360.1-P,Bra035036.1-P	Solyc07g056630.2.1	LOC_Os06g06120.1,LOC_Os06g44275.1,LOC_Os02g14720.1	BGIOSGA022341-PA,BGIOSGA023384-PA,BGIOSGA007870-PA,BGIOSGA023386-PA	Si007566m,Si017266m,Si007994m	GRMZM2G049950,GRMZM2G029690,GRMZM2G111066,GRMZM2G007288,GRMZM2G170088,GRMZM2G105909	Sb10g025900.1,Sb04g008760.1,Sb10g003820.1	BRADI3G09270.1,BRADI1G49077.1	MLOC_59426.1,MLOC_67235.3	Sevir.4G203600, Sevir.1G020300, Sevir.4G067600
176	TaCKX6-D1	Grain_yield	development	Wheat	monocot	COG0277	Y	AT2G19500.1,AT4G29740.2,AT5G56970.1	GLYMA09G07190.1,GLYMA09G07206.1,GLYMA09G07360.1,GLYMA13G16420.2,GLYMA13G16430.1,GLYMA15G18560.1,GLYMA17G06220.1,GLYMA17G06230.1	Bra002777.1-P,Bra024135.1-P,Bra035640.1-P,Bra036719.1-P,Bra040677.1-P	Solyc10g017990.1.1,Solyc12g008900.1.1,Solyc12g008920.1.1	LOC_Os01g10110.1	BGIOSGA002195-PA	Si001500m	GRMZM2G325612	Sb03g002810.1	BRADI2G06030.1	MLOC_53923.1,MLOC_81291.1	Sevir.5G138200
177	Q = wheat AP2-like (WAP2)	Inflorescence_structure,_spike_morphology	development	Wheat	monocot	ENOG410JA1N	N					LOC_Os07g13170.1	BGIOSGA025426-PA	Si029636m	GRMZM2G176175	Sb02g007000.1	BRADI1G53650.4		Sevir.2G093800
178	ALMT1	Metal_tolerance	abiotic_stress_response	Wheat	monocot	ENOG4115K7H	N					LOC_Os04g34010.1		Si015195m,Si012669m,Si033923m,Si035628m	GRMZM5G858653,AC233887.1_FGP005	Sb06g016260.1	BRADI5G09690.1		Sevir.6G010200, Sevir.7G102000, Sevir.9G347200
179	Lr21	Pathogen_resistance	biotic_stress_response	Wheat	monocot	ENOG411BHDX	N					LOC_Os11g45620.1,LOC_Os01g42330.1	BGIOSGA001237-PA	Si013156m	GRMZM2G456779,GRMZM2G375843	Sb09g015250.1		MLOC_70559.1,MLOC_18184.1	Sevir.6G019900
180	Mla1	Pathogen_resistance	biotic_stress_response	Wheat	monocot	ENOG411BZQ2	N										BRADI2G39247.1	MLOC_64444.1,MLOC_21734.1
181	Pm3	Pathogen_resistance	biotic_stress_response	Wheat	monocot	ENOG411BKFE	N					LOC_Os03g63150.1,LOC_Os03g63200.1	BGIOSGA009441-PA	Si020987m,Si020981m,Si025828m,Si024241m,Si025944m,Si024476m,Si025929m,Si027791m	GRMZM2G164217,GRMZM2G354013	Sb08g015350.1,Sb08g015340.1,Sb10g001103.1,Sb08g015400.1		MLOC_34514.1,MLOC_13234.1	Sevir.3G109501, Sevir.3G100200, Sevir.8G253400
182	Reduced height-B1 (RhtB1)	Plant_stature,_dwarfism	development	Wheat	monocot	ENOG410IQYH	N	AT5G17490.1,AT2G01570.1,AT3G03450.1,AT1G14920.1	GLYMA20G34260.1,GLYMA11G33720.1,GLYMA06G23940.1,GLYMA08G10140.1,GLYMA10G33380.1,GLYMA05G27190.1,GLYMA18G04500.1,GLYMA04G21340.1	Bra013973.1-P,Bra024875.1-P,Bra031991.1-P	Solyc11g011260.1.1	LOC_Os01g45860.1,LOC_Os03g49990.1	BGIOSGA013420-PA,BGIOSGA001121-PA	Si001293m,Si039400m	GRMZM2G024973,GRMZM2G144744,GRMZM2G001426	Sb01g010660.1,Sb03g029470.1	BRADI1G11090.1,BRADI2G45117.1	MLOC_67940.1,MLOC_73617.2	Sevir.5G251500, Sevir.9G121800
183	Reduced height-D1 (RhtD1)	Plant_stature,_dwarfism	development	Wheat	monocot	ENOG410IQYH	N	AT5G17490.1,AT2G01570.1,AT3G03450.1,AT1G14920.2	GLYMA20G34260.1,GLYMA11G33720.1,GLYMA06G23940.1,GLYMA08G10140.1,GLYMA10G33380.1,GLYMA05G27190.1,GLYMA18G04500.1,GLYMA04G21340.2	Bra013973.1-P,Bra024875.1-P,Bra031991.1-P	Solyc11g011260.1.2	LOC_Os01g45860.1,LOC_Os03g49990.2	BGIOSGA013420-PA,BGIOSGA001121-PA	Si001293m,Si039400m	GRMZM2G024973,GRMZM2G144744,GRMZM2G001426	Sb01g010660.1,Sb03g029470.2	BRADI1G11090.1,BRADI2G45117.2	MLOC_67940.1,MLOC_73617.3	Sevir.5G251500, Sevir.9G121800
184	flavonoid 3',5'-hydroxylase (F3'5'H)	Plant_coloration_(flowers)	color_texture_flavor_and_fragrance	Wild_Glycine_max	dicot	ENOG411BNKG	N		GLYMA20G08160.1,GLYMA13G04210.1		Solyc11G066580.1.1	LOC_Os03g25150		Si035183m	GRMZM2G119067	Sb01g034470.1,Sb01g034460.1	BRADI2G11620.1,BRADI1G61577.1		Sevir.9G395800
185	TFL1/FvTFL1	Flowering_time_and_seasonal_growth	development	Wild_Strawberry	dicot	KOG3346	N	AT5G03840.1,AT5G62040.1,AT1G18100.1,AT4G20370.1,AT1G65480.1,AT2G27550.1	GLYMA08G47823.1,GLYMA16G32080.3,GLYMA18G53680.1,GLYMA05G34030.1,GLYMA02G07650.1,GLYMA08G47816.1,GLYMA19G28390.1,GLYMA16G26660.1,GLYMA16G26690.1,GLYMA19G37890.1	Bra009508.1-P,Bra025930.1-P,Bra012010.1-P,Bra034357.1-P,Bra031016.1-P,Bra005783.1-P,Bra028815.1-P,Bra004117.1-P,Bra022475.1-P,Bra000506.1-P,Bra015710.1-P,Bra010052.1-P	Solyc05g055660.1.1,Solyc11g008660.1.1,Solyc01g009580.1.1,Solyc03g063100.1.1,Solyc05g053850.2.1,Solyc01g009560.1.1,Solyc11g008640.1.1,Solyc02g079290.2.1,Solyc06g074350.2.1,Solyc09g009560.1.1,Solyc11g008650.1.1,Solyc03g119100.1.1,Solyc03g026050.2.1	LOC_Os04g33570.1,LOC_Os01g02120.1,LOC_Os06g06320.1,LOC_Os04g41130.1,LOC_Os11g18870.1,LOC_Os12g05590.1,LOC_Os12g13030.1,LOC_Os02g32950.1,LOC_Os02g39064.1,LOC_Os06g06300.1,LOC_Os11g05470.1,LOC_Os09g33850.1,LOC_Os02g13830.1,LOC_Os01g11940.1,LOC_Os01g10590.1,LOC_Os06g30370.1,LOC_Os01g54490.1,LOC_Os06g35940.1,LOC_Os05g44180.1	BGIOSGA034481-PA,BGIOSGA036625-PA,BGIOSGA015135-PA,BGIOSGA004454-PA,BGIOSGA017719-PA,BGIOSGA035142-PA,BGIOSGA014833-PA,BGIOSGA003015-PA,BGIOSGA007839-PA,BGIOSGA002959-PA,BGIOSGA021197-PA,BGIOSGA007632-PA,BGIOSGA035141-PA,BGIOSGA022349-PA,BGIOSGA006319-PA,BGIOSGA021057-PA,BGIOSGA006097-PA,BGIOSGA022351-PA,BGIOSGA036381-PA	Si007376m,Si004536m,Si020105m,Si008576m,Si011866m,Si004700m,Si028168m,Si012372m,Si012777m,Si003984m,Si005012m,Si007366m,Si008517m,Si027589m,Si025116m,Si011706m,Si008120m,Si020516m,Si020173m,	GRMZM2G021614,GRMZM2G179264,GRMZM2G338454,GRMZM2G080706,GRMZM2G075215,GRMZM2G141756,GRMZM2G156079,GRMZM2G075081,AC217051.3_FGP006,GRMZM2G103666,GRMZM2G127121,GRMZM2G019993,GRMZM2G021560,GRMZM2G373928,GRMZM2G059358,GRMZM2G400167,GRMZM2G062052,GRMZM2G051338,GRMZM2G108016,AC214791.2_FGP002,GRMZM2G158809,GRMZM2G132880,GRMZM2G440005,GRMZM2G092008,GRMZM2G117057,GRMZM2G152689,GRMZM2G056186	Sb02g029725.1,Sb06g020850.1,Sb10g003940.1,Sb06g012260.1,Sb03g002500.1,Sb03g001700.1,Sb05g003200.1,Sb08g008180.1,Sb03g034580.1,Sb03g008270.1,Sb04g021650.1,Sb10g021790.1,Sb04g025210.1,Sb09g025760.1,Sb08g003210.1,Sb04g008320.1,Sb06g015490.1,Sb0010s003120.1,Sb10g013070.1,	BRADI4G39730.1,BRADI3G44860.1,BRADI4G39760.1,BRADI2G19670.1,BRADI4G35040.1,BRADI2G01020.1,BRADI1G38150.1,BRADI3G08890.1,BRADI4G39750.1,BRADI2G07070.1,BRADI4G42400.1,BRADI1G48830.1,BRADI3G48036.1,BRADI2G27860.1,BRADI5G14010.1,BRADI5G09270.1,BRADI1G42510.1,BRADI2G49795.1,	MLOC_57326.1,MLOC_71606.2,MLOC_74854.1,MLOC_58552.3,MLOC_44160.1,MLOC_13102.1,MLOC_68576.1,MLOC_64619.2,MLOC_35818.3	Sevir.4G148400, Sevir.1G227200, Sevir.4G169200, Sevir.7G075500, Sevir.5G074101, Sevir.8G033800, Sevir.7G154500, Sevir.8G033800, Sevir.5G141700, Sevir.5G320600, Sevir.4G195400, Sevir.4G065600, Sevir.8G109700, Sevir.3G093300, Sevir.8G033800, Sevir.4G102300, Sevir.8G033800, Sevir.5G141700
186	phosphoenolpyruvate carboxylase (PEPC)	C3/C4_photosynthesis_-_enzymatic_properties_	other	Yellowtops	dicot	ENOG410JW91	N							Si005789m	GRMZM2G083841	Sb10g021330.1			Sevir.5G145500
187	CBF gene cluster	Cold_resistance	abiotic_stress_response	Arabidopsis_thaliana	dicot	ENOG410YK37	N	AT4G25490	GLYMA09G27180.2,GLYMA10G38440.1,GLYMA16G32330.1,GLYMA20G29410.1	Bra010460.1-P,Bra010461.1-P,Bra010463.1-P,Bra019162.1-P,Bra022770.1-P	Solyc03g026270.1.1,Solyc03g026280.2.1,Solyc03g124110.1.1
188	CYCD5;1	Endoreduplication	other	Arabidopsis_thaliana	dicot	ENOG410XRKC	N	AT4G37630	GLYMA01G40100.2,GLYMA11G05211.1	Bra017840.1-P		LOC_Os03g10650.1,LOC_Os03g42070.1,LOC_Os12g39830.1	BGIOSGA010240-PA,BGIOSGA011258-PA,BGIOSGA035919-PA	Si022512m,Si036343m,Si036464m	GRMZM2G006721,GRMZM2G007130,GRMZM2G047637,GRMZM2G056303,GRMZM2G329655,GRMZM2G377194	Sb01g014590.1,Sb01g043610.1,Sb08g019760.1	BRADI1G14605.1,BRADI1G70907.1,BRADI4G03121.1	MLOC_5879.1,MLOC_62983.1	Sevir.9G166300, Sevir.9G166300, Sevir.9G504400
189	AtLURE1.1	Fertilization_(pollen-tubeattraction_by_egg)	development	Arabidopsis_thaliana	dicot		N	AT5G43285
190	AtLURE1.2	Fertilization_(pollen-tubeattraction_by_egg)	development	Arabidopsis_thaliana	dicot		N	AT5G43510
191	AtLURE1.3	Fertilization_(pollen-tubeattraction_by_egg)	development	Arabidopsis_thaliana	dicot		N	AT5G43513
192	AtLURE1.4	Fertilization_(pollen-tubeattraction_by_egg)	development	Arabidopsis_thaliana	dicot		N	AT5G43518
193	EARLY FLOWERING 3(ELF3)	Flowering_time	development	Arabidopsis_thaliana	dicot	ENOG4111XSP	Y	AT2G25930	GLYMA04G05280.2,GLYMA14G10530.1,GLYMA17G34980.1	Bra007774.1-P,Bra034284.1-P	Solyc08g065870.2.1,Solyc11g070100.1.1,Solyc12g095900.1.1
194	FLC (Flowering Locus C)	Flowering_time	development	Arabidopsis_thaliana	dicot	COG5068	Y	AT5G10140		Bra022771.1-P
195	FLM (MAF1)	Flowering_time	development	Arabidopsis_thaliana	dicot	COG5068	Y	AT1G77080
196	MADS AFFECTING FLOWERING 2 (MAF2)	Flowering_time	development	Arabidopsis_thaliana	dicot	COG5068	Y	AT5G65050
197	Flowering locus T (FT)	Flowering_time	development	Arabidopsis_thaliana	dicot	COG1881	Y	AT1G65480	GLYMA02G07650.1,GLYMA08G47810.1,GLYMA08G47816.1,GLYMA08G47823.1,GLYMA16G04840.1,GLYMA16G26660.1,GLYMA16G26690.1,GLYMA18G53680.1,GLYMA18G53690.1,GLYMA19G28390.1		Solyc03g063100.1.1,Solyc05g053850.2.1,Solyc05g055660.1.1,Solyc11g008640.1.1,Solyc11g008650.1.1,Solyc11g008660.1.1	LOC_Os01g11940.1,LOC_Os06g06300.1,LOC_Os06g06320.1	BGIOSGA003015-PA,BGIOSGA022349-PA,BGIOSGA022351-PA	Si007366m,Si008120m,Si008517m	GRMZM2G051338,GRMZM2G373928	Sb03g001700.1,Sb10g003940.1	BRADI1G48830.1,BRADI2G07070.1	MLOC_68576.1	Sevir.4G195400, Sevir.4G102300, Sevir.4G065600
198	Frigida (FRI)	Flowering_time	development	Arabidopsis_thaliana	dicot	ENOG410ZN0W	Y	AT4G00650	GLYMA04G38071.1,GLYMA06G17005.1	Bra029192.1-P,Bra035723.1-P	Solyc03g117930.2.1,Solyc06g074450.1.1,Solyc12g042440.1.1	LOC_Os03g63440.1	BGIOSGA013955-PA	Si035611m	GRMZM2G021642	Sb01g001030.1	BRADI1G01520.1	MLOC_27941.1	Sevir.9G008900
199	Frigida like 1 (FRL1)	Flowering_time	development	Arabidopsis_thaliana	dicot	ENOG410YI1U	Y	AT5G16320	GLYMA02G46680.1,GLYMA08G43760.2,GLYMA18G09060.1	Bra008624.1-P
200	Frigida like 2 (FRL2)	Flowering_time	development	Arabidopsis_thaliana	dicot	ENOG410YI1U	Y	AT1G31814	GLYMA02G46680.1,GLYMA08G43760.2,GLYMA18G09060.1	Bra023207.1-P
201	Cryptochrome 2 (CRY2) EDI allele	Flowering_time_and_other_pleiotropic_effects	development	Arabidopsis_thaliana	dicot	COG0415	Y	AT1G04400	GLYMA02G00830.1,GLYMA10G32390.3,GLYMA15G35371.1,GLYMA20G35220.1	Bra030568.1-P	Solyc09g090100.2.1	LOC_Os02g41550.4	BGIOSGA008648-PA	Si006039m	GRMZM2G172152	Sb10g013750.1	BRADI3G49204.1	MLOC_8289.1
202	HUA2	Flowering_time,_Shoot_morphology	development	Arabidopsis_thaliana	dicot	ENOG410ZJEY	Y	AT5G23150									BRADI3G12902.1
203	CYP81F2	Glucosinolate_content_-_aphid_resistance	biotic_stress_response	Arabidopsis_thaliana	dicot	ENOG411C115	N	AT5G57220		Bra020459.1-P
204	AOP2	Glucosinolate_production	biotic_stress_response	Arabidopsis_thaliana	dicot	COG3491	Y	AT4G03060		Bra000848.1-P,Bra018521.1-P,Bra034180.1-P
205	AOP3	Glucosinolate_production	biotic_stress_response	Arabidopsis_thaliana	dicot	COG3491	Y	AT4G03050	GLYMA07G03790.1					Si012411m,Si012520m		Sb07g020360.1			Sevir.7G047400
206	MAM1	Glucosinolate_production	biotic_stress_response	Arabidopsis_thaliana	dicot	COG0119	Y	AT5G23010		Bra013007.1-P,Bra021947.1-P,Bra029355.1-P,Bra029356.1-P
207	SG3	Growth_(shoots)	development	Arabidopsis_thaliana	dicot	COG2509	Y	At4G30720	GLYMA04G24054.1,GLYMA07G11531.1	Bra024046.1-P	Solyc07g005870.2.1	LOC_Os05g34040.1	BGIOSGA018060-PA	Si021394m	GRMZM2G167243,GRMZM5G891783	Sb09g020310.1	BRADI2G25410.1	MLOC_71107.2	Sevir.3G248800
208	AT5G41740/AT5G41750	Hybrid_incompatibility_(auto-immune_necrosis)	other	Arabidopsis_thaliana	dicot	ENOG410XRGK	Y	AT5G41740		Bra005271.1-P		LOC_Os08g42700.1		Si027292m,Si028140m,Si028241m		Sb05g022785.1,Sb05g022790.1			Sevir.8G177101
209	AT5G41740/AT5G41750	Hybrid_incompatibility_(auto-immune_necrosis)	other	Arabidopsis_thaliana	dicot	ENOG4112BMQ	Y	AT5G41750
210	Epithiospecifier protein (ESP)	Hydrolysis_of_glucosinolate,_protection_against_herbivores_	biotic_stress_response	Arabidopsis_thaliana	dicot	ENOG410Y5WM	Y	AT1G54040	GLYMA08G18080.1	Bra037958.1-P,Bra039702.1-P	Solyc05g024410.2.1	LOC_Os09g07460.1	BGIOSGA030165-PA	Si030487m	GRMZM2G165098	Sb02g006860.1	BRADI2G38270.1	MLOC_7324.1	Sevir.2G159700
211	2020-04-02	Increases_shoot_sulfate_content	abiotic_stress_response	Arabidopsis_thaliana	dicot	COG0175	Y	AT1G62180	GLYMA07G39130.1,GLYMA09G00670.1,GLYMA15G11540.1	Bra034466.1-P	Solyc02g032860.2.1,Solyc02g080640.2.1,Solyc03g031620.2.1	LOC_Os07g32570.1	BGIOSGA024240-PA	Si029784m	AC189750.4_FGP004,GRMZM2G087254	Sb02g034370.1	BRADI1G26530.1	MLOC_34830.1	Sevir.2G338800
212	phytochrome A (PHYA)	Light_sensitivity	abiotic_stress_response	Arabidopsis_thaliana	dicot	COG4251	Y	AT1G09570	GLYMA03G38620.1,GLYMA10G28170.2,GLYMA19G41210.1,GLYMA20G22160.1	Bra020013.1-P	Solyc10g044670.1.1	LOC_Os03g51030.1		Si027327m,Si033984m	GRMZM2G157727,GRMZM2G181028	Sb01g009920.1,Sb01g009930.1,Sb0919s002010.1	BRADI1G10510.1,BRADI1G10520.1		Sevir.9G112300
213	phytochrome B (PHYB)	Light_sensitivity	abiotic_stress_response	Arabidopsis_thaliana	dicot	COG4251	Y	AT2G18790	GLYMA09G03990.1,GLYMA15G14980.1	Bra022192.1-P	Solyc01g059870.2.1,Solyc05g053410.2.1	LOC_Os03g19590.1		Si033968m	GRMZM2G092174,GRMZM2G124532	Sb01g037340.1	BRADI1G64360.1	MLOC_9834.1	Sevir.9G432200
214	phytochrome C (PHYC)	Light_sensitivity	abiotic_stress_response	Arabidopsis_thaliana	dicot	COG4251	Y	AT5G35840		Bra039485.1-P	Solyc07g045480.2.1	LOC_Os03g54084.1	BGIOSGA013571-PA	Si034030m	GRMZM2G027493,GRMZM2G057935,GRMZM2G129889,GRMZM2G345509	Sb01g007850.1	BRADI1G08400.1	MLOC_824.2	Sevir.9G088200
215	FPN2	Metal_tolerance	abiotic_stress_response	Arabidopsis_thaliana	dicot	ENOG410XS3F	Y	AT5G03570	GLYMA01G31940.2,GLYMA01G31961.1,GLYMA03G05190.1,GLYMA03G05201.1	Bra005771.1-P	Solyc10g076280.1.1	LOC_Os06g36450.1	BGIOSGA023091-PA	Si006410m	GRMZM2G110862,GRMZM2G148060	Sb10g022120.1	BRADI1G37907.1	MLOC_51377.2	Sevir.4G281800
216	FRD3 (FERRIC REDUCTASE DEFECTIVE3)	Metal_tolerance	abiotic_stress_response	Arabidopsis_thaliana	dicot	COG0534	Y	AT3G08040	GLYMA09G15550.2,GLYMA12G36610.1,GLYMA12G36620.2,GLYMA13G27300.2,GLYMA15G43021.1	Bra001282.1-P,Bra001283.1-P,Bra029694.1-P,Bra040047.1-P	Solyc01g087150.2.1	LOC_Os01g69010.1_,LOC_Os03g11734.1	BGIOSGA005059-PA,BGIOSGA011208-PA	Si034942m	GRMZM2G163154,GRMZM2G418400	Sb01g042740.1,Sb03g043890.1	BRADI1G69770.1	MLOC_66238.1	Sevir.9G493200
217	heavy metal atpase3 (HMA3)	Metal_tolerance	abiotic_stress_response	Arabidopsis_thaliana	dicot	COG2217	Y	AT4G30120		Bra011165.1-P,Bra024103.1-P	Solyc07g009130.2.1	LOC_Os06g48720,LOC_Os07g12900.1	BGIOSGA020589-PA,BGIOSGA024568-PA	Si005738m,Si028881m,Si033111m	AC205008.4_FGP002,GRMZM2G099191,GRMZM2G175576,GRMZM2G455491	Sb02g006940.1,Sb02g006950.1,Sb10g028920.1	BRADI1G34140.1,BRADI1G53670.1	MLOC_10131.1,MLOC_18862.4,MLOC_52795.2	Sevir.4G255000, Sevir.2G092800
218	heavy metal atpase4 (HMA4)	Metal_tolerance	abiotic_stress_response	Arabidopsis_thaliana	dicot	COG2217	Y	AT2G19110		Bra024449.1-P,Bra038842.1-P	Solyc07g009130.2.1	LOC_Os06g48720.1,LOC_Os07g12900.1	BGIOSGA020589-PA,BGIOSGA024568-PA	Si005738m,Si028881m,Si033111m	AC205008.4_FGP002,GRMZM2G099191,GRMZM2G175576,GRMZM2G455491	Sb02g006940.1,Sb02g006950.1,Sb10g028920.1	BRADI1G34140.1,BRADI1G53670.1	MLOC_10131.1,MLOC_18862.4,MLOC_52795.2	Sevir.4G255000, Sevir.2G092800
219	heavy metal atpase5 (HMA5)	Metal_tolerance	abiotic_stress_response	Arabidopsis_thaliana	dicot	COG2217	Y	AT1G63440		Bra027641.1-P					GRMZM2G035459
220	Molybdenum transporter1 (MOT1)	Metal_tolerance	abiotic_stress_response	Arabidopsis_thaliana	dicot	ENOG410XTGP	Y	AT2G25680	GLYMA04G07690.1,GLYMA06G07780.1,GLYMA14G16610.2,GLYMA17G29830.2,GLYMA17G29850.2,GLYMA17G29950.1	Bra007781.1-P,Bra011159.1-P	Solyc10g084680.1.1	LOC_Os08g01120.1	BGIOSGA027829-PA,BGIOSGA027831-PA	Si035427m	GRMZM2G083156	Sb01g016450.1	BRADI2G08130.1	MLOC_61355.1	Sevir.9G183400
221	metal tolerance protein1	Metal_tolerance	abiotic_stress_response	Arabidopsis_thaliana	dicot	COG1230	Y	AT2G46800		Bra000432.1-P,Bra004506.1-P,Bra040484.1-P
222	mucilage-modified 2 (mum2)	Mucilage_(seeds)	other	Arabidopsis_thaliana	dicot	COG1874	Y	AT5G63800	GLYMA04G38580.2,GLYMA05G32841.1,GLYMA06G16430.1,GLYMA08G00470.1	Bra024237.1-P		LOC_Os05g35360.1	BGIOSGA018014-PA	Si004751m,Si021244m,Si024535m	AC234152.1_FGP005,GRMZM2G153194,GRMZM2G153200	Sb07g001163.1,Sb09g021140.1	BRADI2G24670.1,BRADI2G56597.1	MLOC_36885.12,MLOC_51278.2	Sevir.5G404500, Sevir.5G404500
223	Epithiospecifier Modifier1 (ESM1)	Nitrile_content	abiotic_stress_response	Arabidopsis_thaliana	dicot	ENOG41106MS	Y	AT3G14210		Bra027358.1-P,Bra027359.1-P
224	KCS18	Oil_composition	color_texture_flavor_and_fragrance	Arabidopsis_thaliana	dicot	COG3424	Y	AT4G34520		Bra034635.1-P		LOC_Os01g34560.1,LOC_Os04g02640.1	BGIOSGA003684-PA,BGIOSGA015785-PA	Si001213m,Si010043m,Si012532m	GRMZM2G060481	Sb03g023131.1,Sb06g001920.1	BRADI1G44840.1,BRADI2G40410.1	MLOC_45058.1	Sevir.7G098900
225	RAC1	Pathogen_resistance	biotic_stress_response	Arabidopsis_thaliana	dicot	ENOG410JN8Q	N	At1G31540	GLYMA12G19435.1,GLYMA18G53131.1,GLYMA02G09801.1	Bra004192.1-P	Solyc02G086350.2.1	LOC_Os01g49740.1	BGIOSGA004247-PA	Si000605m	GRMZM2G146878	Sb03g031810.1	BRADI2G47130.1	MLOC_63421.1	Sevir.5G282100
226	RLM1	Pathogen_resistance	biotic_stress_response	Arabidopsis_thaliana	dicot	ENOG410ZQRA	Y	AT1G64070
227	RLM2 cluster	Pathogen_resistance	biotic_stress_response	Arabidopsis_thaliana	dicot	COG0638	Y	At4G15160		Bra039563.1-P
228	RLM3	Pathogen_resistance	biotic_stress_response	Arabidopsis_thaliana	dicot	ENOG410IGA8	N	AT4G16990		Bra029443.1-P,Bra021754.1-P,Bra025467.1-P,Bra006094.1-P,Bra010663.1-P,Bra010496.1-P,Bra006146.1-P,Bra038872.1-P,Bra002117.1-P,Bra028499.1-P,Bra017807.1-P,Bra010589.1-P,Bra006556.1-P,Bra023670.1-P,Bra027778.1-P,Bra012688.1-P,Bra027660.1-P,Bra027510.1-P,Bra040210.1-P,Bra019273.1-P,Bra019410.1-P,Bra036417.1-P,Bra017542.1-P,Bra023647.1-P,Bra017544.1-P,Bra003997.1-P,Bra032045.1-P
229	RPM1	Pathogen_resistance	biotic_stress_response	Arabidopsis_thaliana	dicot	ENOG411BG27	N	AT3G07040	GLYMA09G34360.2,GLYMA06G46830.1,GLYMA01G01420.1,GLYMA20G08340.1,GLYMA06G46800.2,GLYMA09G34381.1,GLYMA06G46810.1,GLYMA08G41800.2,GLYMA01G01400.1		Solyc01g086810.2.1,Solyc08g005440.2.1	LOC_Os07g08890.1,LOC_Os04g21890.1,LOC_Os07g40810.1,LOC_Os10g21400.1,LOC_Os10g04674.1,LOC_Os04g46300.1,LOC_Os10g07534.1,LOC_Os08g32880.1,LOC_Os06g48520.1	BGIOSGA032578-PA,BGIOSGA016070-PA,BGIOSGA028698-PA,BGIOSGA023959-PA	Si009314m,Si008124m,Si005193m,Si000229m,Si031978m,Si005798m,Si028865m,Si005799m	GRMZM2G162098,GRMZM2G105428,GRMZM2G077937,GRMZM2G091672,GRMZM2G091696	Sb01g028490.1,Sb02g038425.1,Sb10g028730.1,Sb02g004900.1,Sb06g024420.1,Sb03g036150.1,Sb10g028720.1	BRADI4G14697.1,BRADI4G09247.1,BRADI5G01167.1,BRADI1G22500.1,BRADI5G17527.1	MLOC_67526.2,MLOC_1192.1,MLOC_20874.1,MLOC_56324.1,MLOC_17579.2	Sevir.7G199900, Sevir.5G341600, Sevir.5G053300, Sevir.2G389700, Sevir.2G065300, Sevir.4G256900
230	RPP1-WsA	Pathogen_resistance	biotic_stress_response	Arabidopsis_thaliana	dicot	ENOG410BYK9	N	AT3G44670		Bra019409.1-P,Bra020861.1-P
231	RPP1-WsB	Pathogen_resistance	biotic_stress_response	Arabidopsis_thaliana	dicot	ENOG410J606	N	AT3G25510	GLYMA12G15850.2,GLYMA06G41430.1,GLYMA12G16450.1,GLYMA06G40710.1,GLYMA06G40950.1,GLYMA06G40980.1,GLYMA06G41241.1,GLYMA06G43850.1,GLYMA06G41290.2,GLYMA06G40690.1,GLYMA06G41380.2,GLYMA06G40780.1	Bra036413.1-P,Bra010590.1-P,Bra019409.1-P,Bra020861.1-P,Bra022850.1-P	Solyc05G006630.2.1,Solyc11G011090.1.1			Si026026m		Sb05g025450.1,Sb05g025470.1	BRADI2G41920.1	MLOC_7267.3,MLOC_77255.1
232	RPP1-WsC	Pathogen_resistance	biotic_stress_response	Arabidopsis_thaliana	dicot	ENOG410BYK9	N	AT3G44480		Bra019409.1-P,Bra020861.1-P
233	RPP13	Pathogen_resistance	biotic_stress_response	Arabidopsis_thaliana	dicot	ENOG411BQQH	N	AT3G46530		Bra037123.1-P	Solyc04G009690.1.1,Solyc04G009130.2.1,Solyc04G009290.1.1,Solyc04G009240.1.1,Solyc04G009250.1.1,Solyc04G009110.1.1,Solyc04G009260.1.1,Solyc04G009660.2.1,Solyc04G009150.1.1,Solyc04G009120.1.1,Solyc04G026110.2.1
234	RPP2A	Pathogen_resistance	biotic_stress_response	Arabidopsis_thaliana	dicot	ENOG410J6H3	N	At4G19500	GLYMA16G03780.1GLYMA06G46665.1GLYMA20G02472.1GLYMA20G10833.1GLYMA15G02870.1GLYMA02G43630.2GLYMA13G03770.1GLYMA14G05321.1GLYMA01G03964.1GLYMA01G03980.2GLYMA01G03921.1GLYMA11G21361.1GLYMA01G04000.1	Bra036799.1-PBra022039.1-PBra012541.1-PBra023632.1-PBra013959.1-PBra029431.1-PBra022034.1-PBra022037.1-PBra012689.1-P	Solyc04g007320.1.1,Solyc07g055380.1.1,Solyc04g056570.2.1,Solyc02g082050.2.1
235	RPP2B	Pathogen_resistance	biotic_stress_response	Arabidopsis_thaliana	dicot	ENOG4112BMQ	Y	At4G19510		Bra000759.1-P
236	RPP4	Pathogen_resistance	biotic_stress_response	Arabidopsis_thaliana	dicot	ENOG410IGA8	N	AT4G16860		Bra029443.1-P,Bra021754.1-P,Bra025467.1-P,Bra006094.1-P,Bra010663.1-P,Bra010496.1-P,Bra006146.1-P,Bra038872.1-P,Bra002117.1-P,Bra028499.1-P,Bra017807.1-P,Bra010589.1-P,Bra006556.1-P,Bra023670.1-P,Bra027778.1-P,Bra012688.1-P,Bra027660.1-P,Bra027510.1-P,Bra040210.1-P,Bra019273.1-P,Bra019410.1-P,Bra036417.1-P,Bra017542.1-P,Bra023647.1-P,Bra017544.1-P,Bra003997.1-P,Bra032045.1-P
237	RPP5	Pathogen_resistance	biotic_stress_response	Arabidopsis_thaliana	dicot	ENOG410IGA8	N	AT4G16950		Bra029443.1-P,Bra021754.1-P,Bra025467.1-P,Bra006094.1-P,Bra010663.1-P,Bra010496.1-P,Bra006146.1-P,Bra038872.1-P,Bra002117.1-P,Bra028499.1-P,Bra017807.1-P,Bra010589.1-P,Bra006556.1-P,Bra023670.1-P,Bra027778.1-P,Bra012688.1-P,Bra027660.1-P,Bra027510.1-P,Bra040210.1-P,Bra019273.1-P,Bra019410.1-P,Bra036417.1-P,Bra017542.1-P,Bra023647.1-P,Bra017544.1-P,Bra003997.1-P,Bra032045.1-P
238	RPP8	Pathogen_resistance	biotic_stress_response	Arabidopsis_thaliana	dicot	ENOG411C0JY	N	AT5G43470		Bra018448.1-P
239	RPS2	Pathogen_resistance	biotic_stress_response	Arabidopsis_thaliana	dicot	COG0052	Y	AT3G03600		Bra031984.1-P	Solyc01g081520.2.1	LOC_Os12g33954.1,LOC_Os12g34092.1,LOC_Os12g34154.1		Si020736m	GRMZM2G065626,GRMZM2G106039,GRMZM2G155363,GRMZM5G851130
240	RPS4	Pathogen_resistance	biotic_stress_response	Arabidopsis_thaliana	dicot	ENOG410JS6A	N	AT5G45250		Bra027599.1-P
241	RPS5	Pathogen_resistance	biotic_stress_response	Arabidopsis_thaliana	dicot	ENOG411C5CK	N	AT1G12220		Bra015597.1-P
242	RRS1	Pathogen_resistance	biotic_stress_response	Arabidopsis_thaliana	dicot	ENOG410ZRAD	Y	AT5G45260		Bra027598.1-P
243	WRR4	Pathogen_resistance	biotic_stress_response	Arabidopsis_thaliana	dicot	ENOG410IGA8	N	AT1G56510		Bra029443.1-P,Bra021754.1-P,Bra025467.1-P,Bra006094.1-P,Bra010663.1-P,Bra010496.1-P,Bra006146.1-P,Bra038872.1-P,Bra002117.1-P,Bra028499.1-P,Bra017807.1-P,Bra010589.1-P,Bra006556.1-P,Bra023670.1-P,Bra027778.1-P,Bra012688.1-P,Bra027660.1-P,Bra027510.1-P,Bra040210.1-P,Bra019273.1-P,Bra019410.1-P,Bra036417.1-P,Bra017542.1-P,Bra023647.1-P,Bra017544.1-P,Bra003997.1-P,Bra032045.1-P
244	ACD6 = ACCELERATED CELL DEATH 6	Plant_defense_Vs_Growth	development	Arabidopsis_thaliana	dicot	ENOG411BZQV	N	AT4G14400		Bra034211.1-P
245	GIBBERELLIC ACID REQUIRING 1 (GA1)	Plant_morphology_(flowers)	development	Arabidopsis_thaliana	dicot	ENOG410XNXR	Y	AT4G02780	GLYMA03G31080.2,GLYMA03G31111.1,GLYMA19G33951.1	Bra000864.1-P,Bra036239.1-P	Solyc06g084240.1.1	LOC_Os02g17780.1,LOC_Os02g36210.1,LOC_Os04g09900.1	BGIOSGA006694-PA,BGIOSGA008469-PA,BGIOSGA015502-PA	Si019171m,Si029001m,Si038735m,Si040211m	AC218998.2_FGP011,GRMZM2G044481,GRMZM2G068808,GRMZM2G081554	Sb01g021990.1,Sb05g022290.1		MLOC_11775.1,MLOC_5926.3,MLOC_5927.6	Sevir.1G206900, Sevir.2G150600, Sevir.9G357500, Sevir.9G265300
246	phytochrome D (PHYD)	Pleiotropic_effects:_increased_petiole_length,_reduced_cotyledon_area_and_anthocyanin_accumulation_in_seedling_stems,_diminished_effect_of_end-of-day_pulse_of_far_red_light_on_hypocotyl_elongation,_decrease_in_number_of_rosette_leaves_at_onset_of_flowering	development	Arabidopsis_thaliana	dicot	COG4251	Y	AT4G16250	GLYMA09G03990.1,GLYMA15G14980.1		Solyc01g059870.2.1,Solyc05g053410.2.1	LOC_Os03g19590.1		Si033968m	GRMZM2G092174,GRMZM2G124532	Sb01g037340.1	BRADI1G64360.1	MLOC_9834.1	Sevir.9G432200
247	ERECTA	Pleiotropic:_Plant_and_leaf_architecture,_Transpiration	development	Arabidopsis_thaliana	dicot	ENOG410IFET	N	AT2G26330	GLYMA16G32830.1,GLYMA20G29011.1,GLYMA17G34380.1,GLYMA06G05900.4,GLYMA09G27950.1,GLYMA10G38730.1,GLYMA14G11220.1	Bra009287.1-P,Bra007759.1-P	Solyc08g061560.2.1,Solyc03g007050.2.1	LOC_Os06g03970.1,LOC_Os06g10230.1	BGIOSGA022235-PA,BGIOSGA021705-PA	Si005782m,Si005775m,Si016227m	GRMZM2G082855,GRMZM5G809695,GRMZM2G463904	Sb10g006670.1,Sb10g001970.1	BRADI1G46450.1,BRADI1G49950.1	MLOC_63726.1,MLOC_34350.4	Sevir.4G019500, Sevir.4G085800, Sevir.4G085800
248	resistant to methyl viologen 1 (RMV1)	Polyamine_uptake	Abiotic_stress_response	Arabidopsis_thaliana	dicot	COG0531	Y	AT5G05630	GLYMA01G35320.1,GLYMA09G34750.1,GLYMA16G17460.1	Bra009122.1-P	Solyc08g005540.1.1,Solyc08g075710.2.1,Solyc08g078100.1.1	LOC_Os03g37984.1	BGIOSGA013004-PA	Si013633m	GRMZM2G078292	Sb07g004285.1	BRADI3G16160.1	MLOC_13546.2	Sevir.6G047800
249	RAS1	Salt_and_abscisic_acid_sensitivity	Abiotic_stress_response	Arabidopsis_thaliana	dicot	ENOG41117SN	Y	AT1G09950	GLYMA07G18380.1,GLYMA18G43250.1	Bra019973.1-P,Bra031691.1-P	Solyc09g005610.2.1
250	AtHKT1	Salt_tolerance	Abiotic_stress_response	Arabidopsis_thaliana	dicot	COG0168	Y	AT4G10310	GLYMA01G00530.2,GLYMA06G42340.1,GLYMA07G15590.2,GLYMA12G16040.1	Bra033189.1-P	Solyc07g014680.2.1,Solyc07g014690.2.1	LOC_Os01g20160.1,LOC_Os04g51830.1	BGIOSGA001800-PA,BGIOSGA014385-PA	Si001214m,Si001234m,Si009720m	GRMZM2G047616	Sb03g012590.1,Sb06g027900.1	BRADI1G45940.1,BRADI5G21030.1	MLOC_58742.2	Sevir.5G195200, Sevir.5G023200, Sevir.7G241950
251	DOG1 (DELAY OF GERMINATION 1)	Seed_dormancy	development	Arabidopsis_thaliana	dicot	ENOG410YM4K	Y	AT5G45830		Bra017589.1-P,Bra025050.1-P	Solyc02g072570.1.1,Solyc02g073570.1.1,Solyc03g006120.2.1		BGIOSGA004490-PA	Si005106m	GRMZM2G446220	Sb03g035150.1	BRADI1G44237.1	MLOC_18507.1	Sevir.5G328900
252	Brevis radix (BRX)	Shorter_root	development	Arabidopsis_thaliana	dicot	ENOG410YFJP	Y	AT1G31880	GLYMA01G35180.2,GLYMA16G08070.2,GLYMA16G17590.2	Bra023219.1-P,Bra033869.1-P,Bra035521.1-P	Solyc08g075920.2.1,Solyc12g096110.1.1	LOC_Os02g47230.1	BGIOSGA005786-PA,BGIOSGA014419-PA	Si010371m,Si017173m	GRMZM2G108996,GRMZM2G374203	Sb04g030790.1,Sb06g027450.1	BRADI3G52537.1,BRADI5G20580.1	MLOC_37555.4,MLOC_63913.1	Sevir.7G235900, Sevir.7G235900
253	GLABROUS1	Trichome_(leaves)	development	Arabidopsis_thaliana	dicot	COG5147	Y	AT3G27920		Bra025311.1-P,Bra039065.1-P
